# Supplementary material for: Arthrobacter woluwensis Bacteremia: A Clinical and Genomic Report
Source: Pathogens. 2021 Apr 8;10(4):443. doi: 10.3390/pathogens10040443 (PMC8068144; doi:10.3390/pathogens10040443)
Supplement: Supplementary file 1 [file pathogens-10-00443-s001.xlsx]

## Sheet: Sheet1
	qseqid	sseqid	pident	length	mismatch	gap	qstart	qend	sstart	send	evalue	bitscore	slen	coverage	VFGID	gene	protein function	bacteria origin
0	contig_2_segment0_2	VFG015379(gi:152986872)!(PSPA7_0144)!probable!ATP-binding!component!of!ABC!transporter![Hcp!secretion!island-1!encoded!type!VI!secretion!system!(H-T6SS)!(CVF535)]![Pseudomonas!aeruginosa!PA7]	37.4	243	130	6	7	687	1	237	1.7e-24	110.5	239	0.991632	VFG015379	PSPA7_0144	probable ATP-binding component of ABC transporter	Pseudomonas aeruginosa PA7
1	contig_2_segment0_61	VFG018402(gi:161505694)!(mgtB)!hypothetical!protein![Mg2+!transport!(CVF005)]![Salmonella!enterica!subsp.!arizonae!serovar!62:z4,z23:--!str.!RSK2980]	50.8	888	413	10	106	2742	35	907	7.2e-241	831.2	908	0.961454	VFG018402	mgtB	hypothetical protein	Salmonella enterica subsp. arizonae serovar 62:z4,z23:-- str. RSK2980
2	contig_2_segment0_62	VFG022673(gi:169630673)!(mgtC)!Mg2+!transport!P-type!ATPase!C!MgtC![Magnesium!transport!(CVF313)]![Mycobacterium!abscessus!ATCC!19977]	58.7	230	91	3	1	684	1	228	2.9e-61	232.6	240	0.95	VFG022673	mgtC	Mg2+ transport P-type ATPase C MgtC	Mycobacterium abscessus ATCC 19977
3	contig_2_segment0_93	VFG043550(gi:15607581)!(Rv0440)!chaperonin!GroEL![GroEL(Hsp60)/Cpn60.2!(AI353)]![Mycobacterium!tuberculosis!H37Rv]	85.5	539	76	2	1	1614	1	538	8.8e-247	850.1	540	0.996296	VFG043550	Rv0440	chaperonin GroEL	Mycobacterium tuberculosis H37Rv
4	contig_2_segment0_97	VFG009807(gi:126437538)!(phoP)!two!component!transcriptional!regulator,!winged!helix!family![PhoP/R!(CVF331)]![Mycobacterium!sp.!JLS]	58.5	236	94	2	1	702	3	236	3.4e-73	272.3	239	0.979079	VFG009807	phoP	two component transcriptional regulator, winged helix family	Mycobacterium sp. JLS
5	contig_2_segment0_101	VFG026467(gi:507421907)!(ideR)!iron-dependent!repressor!and!activator!IdeR![Iron-dependent!regulator!(CVF314)]![Mycobacterium!abscessus!subsp.!bolletii!50594]	58.7	230	88	3	1	684	1	225	1.9e-65	246.5	228	0.986842	VFG026467	ideR	iron-dependent repressor and activator IdeR	Mycobacterium abscessus subsp. bolletii 50594
6	contig_2_segment0_107	VFG013249(gi:68248611)!(msbA)!lipid!A!export!ATP-binding!protein!MsbA![LOS!(CVF494)]![Haemophilus!influenzae!86-028NP]	30.4	602	385	9	79	1872	15	586	1.1e-60	232.3	587	0.974446	VFG013249	msbA	lipid A export ATP-binding protein MsbA	Haemophilus influenzae 86-028NP
7	contig_2_segment0_108	VFG000035(gb|NP_878992)!(bplD)!UDP-N-acetylglucosamine!2-epimerase![LPS!(VF0033)]![Bordetella!pertussis!Tohama!I]	36.2	359	211	6	40	1086	5	355	3.5e-48	189.9	362	0.969613	VFG000035	bplD	UDP-N-acetylglucosamine 2-epimerase	Bordetella pertussis Tohama I
8	contig_2_segment0_151	VFG013252(gi:33152665)!(msbA)!ABC!transporter!ATP-binding!protein!MsbA![LOS!(CVF494)]![Haemophilus!ducreyi!35000HP]	28	574	403	5	4	1716	15	581	2.5e-61	234.2	582	0.974227	VFG013252	msbA	ABC transporter ATP-binding protein MsbA	Haemophilus ducreyi 35000HP
9	contig_2_segment0_155	VFG016428(gi:118480312)!(ugd)!UDP-glucose!6-dehydrogenase![Polysaccharide!capsule!(CVF567)]![Bacillus!thuringiensis!str.!Al!Hakam]	36.4	439	263	8	1	1299	1	429	8.3e-73	271.9	445	0.964045	VFG016428	ugd	UDP-glucose 6-dehydrogenase	Bacillus thuringiensis str. Al Hakam
10	contig_2_segment0_192	VFG024200(gi:406033401)!(devR/dosR)!two-component!system!response!regulator![DevR/S!(CVF334)]![Mycobacterium!indicus!pranii!MTCC!9506]	47.9	213	108	1	31	669	8	217	1.6e-48	190.3	218	0.963303	VFG024200	devR/dosR	two-component system response regulator	Mycobacterium indicus pranii MTCC 9506
11	contig_2_segment0_195	VFG042739(gi:15600525)!(crc)!catabolite!repression!control!protein![type!IV!pili!(AI097)]![Pseudomonas!aeruginosa!PAO1]	35.7	266	154	6	19	804	1	253	2.3e-41	166.8	259	0.976834	VFG042739	crc	catabolite repression control protein	Pseudomonas aeruginosa PAO1
12	contig_2_segment0_217	VFG018662(gi:157151177)!(eno)!enolase![Streptococcal!enolase!(CVF153)]![Streptococcus!gordonii!str.!Challis!substr.!CH1]	59.8	433	166	1	1	1275	1	433	1.4e-146	516.9	434	0.997696	VFG018662	eno	enolase	Streptococcus gordonii str. Challis substr. CH1
13	contig_2_segment0_234	VFG044071(gi:15607346)!(Rv0205)!transmembrane!protein![HasA-type!hemophore-mediated!heme!uptake!system!(IA045)]![Mycobacterium!tuberculosis!H37Rv]	33.2	352	235	0	85	1140	14	365	3.1e-45	180.3	367	0.959128	VFG044071	Rv0205	transmembrane protein	Mycobacterium tuberculosis H37Rv
14	contig_2_segment0_314	VFG047250!(Fphi_0366)!UDP-N-acetylglucosamine!pyrophosphorylase/glucosamine-1-phosphate!N-acetyltransferase![LPS!(CVF834)]![Francisella!philomiragia!subsp.!philomiragia!ATCC!25017]	35.7	454	277	6	28	1380	4	445	5.7e-67	252.7	451	0.980044	VFG047250	Fphi_0366	UDP-N-acetylglucosamine pyrophosphorylase/glucosamine-1-phosphate N-acetyltransferase	Francisella philomiragia subsp. philomiragia ATCC 25017
15	contig_2_segment0_332	VFG048868!(A79E_1603)!GDP-L-fucose!synthetase![Capsule!(CVF854)]![Klebsiella!pneumoniae!subsp.!pneumoniae!1084]	48.4	316	152	2	73	990	8	322	1.4e-85	313.9	322	0.978261	VFG048868	A79E_1603	GDP-L-fucose synthetase	Klebsiella pneumoniae subsp. pneumoniae 1084
16	contig_2_segment0_377	VFG043491(gi:24216818)!(ligA)!NAD!dependent!DNA!ligase![Fibronectin-binding!protein!(AI240)]![Leptospira!interrogans!serovar!Lai!str.!56601]	31.7	726	406	18	97	2238	24	671	3.2e-88	323.9	681	0.951542	VFG043491	ligA	NAD dependent DNA ligase	Leptospira interrogans serovar Lai str. 56601
17	contig_2_segment0_381	VFG043408(gi:42780821)!(cheY)!chemotaxis!response!regulator![peritrichous!flagella!(AI153)]![Bacillus!cereus!ATCC!10987]	28.4	116	78	1	19	351	5	120	1.9e-09	60.5	122	0.95082	VFG043408	cheY	chemotaxis response regulator	Bacillus cereus ATCC 10987
18	contig_2_segment0_434	VFG012973(gi:82775876)!(entA)!2,3-dihydro-2,3-dihydroxybenzoate!dehydrogenase![Enterobactin!synthesis!(CVF477)]![Shigella!dysenteriae!Sd197]	29.7	259	162	5	10	777	3	244	1.7e-17	87.4	248	0.975806	VFG012973	entA	2,3-dihydro-2,3-dihydroxybenzoate dehydrogenase	Shigella dysenteriae Sd197
19	contig_2_segment0_440	VFG041575(gi:269138242)!(esrB)!two-component!response!regulator!EsrB,!LuxR!family![T3SS!(SS025)]![Edwardsiella!tarda!EIB202]	31.2	205	136	1	19	618	8	212	3.5e-18	89.4	214	0.957944	VFG041575	esrB	two-component response regulator EsrB, LuxR family	Edwardsiella tarda EIB202
20	contig_2_segment0_471	VFG029181(gi:494691572)!(fadE14)!acyl-CoA!dehydrogenase!FADE13![Mycobactin!(CVF315)]![Mycobacterium!tuberculosis!str.!Haarlem/NITR202]	27.9	369	245	9	106	1167	16	378	9e-23	105.5	382	0.950262	VFG029181	fadE14	acyl-CoA dehydrogenase FADE13	Mycobacterium tuberculosis str. Haarlem/NITR202
21	contig_2_segment0_477	VFG002189(gb|NP_816140)!(cpsB)!phosphatidate!cytidylyltransferase![Capsule!(VF0361)]![Enterococcus!faecalis!V583]	27.3	271	166	9	106	873	5	259	8.7e-18	88.6	266	0.958647	VFG002189	cpsB	phosphatidate cytidylyltransferase	Enterococcus faecalis V583
22	contig_2_segment0_481	VFG000119(gb|NP_253948)!(algR)!alginate!biosynthesis!regulatory!protein!AlgR![Alginate!(VF0091)]![Pseudomonas!aeruginosa!PAO1]	36.8	242	128	4	1	654	5	245	4.7e-27	119	248	0.971774	VFG000119	algR	alginate biosynthesis regulatory protein AlgR	Pseudomonas aeruginosa PAO1
23	contig_2_segment0_488	VFG016499(gi:54020422)!(pdhB)!pyruvate!dehydrogenase!(lipoamide)!e1-beta!chain![PDH-B!(CVF588)]![Mycoplasma!hyopneumoniae!232]	42.7	321	178	2	25	975	14	332	1.1e-69	261.2	334	0.95509	VFG016499	pdhB	pyruvate dehydrogenase (lipoamide) e1-beta chain	Mycoplasma hyopneumoniae 232
24	contig_2_segment0_493	VFG029172(gi:397679176)!(fadE14)!acyl-CoA!dehydrogenase!YngJ![Mycobactin!(CVF315)]![Mycobacterium!abscessus!subsp.!bolletii!str.!GO!06]	34.3	379	239	4	19	1149	4	374	1.8e-52	204.1	379	0.978892	VFG029172	fadE14	acyl-CoA dehydrogenase YngJ	Mycobacterium abscessus subsp. bolletii str. GO 06
25	contig_2_segment0_496	VFG044282(gi:197284140)!(pbtl)!citrate!lyase!beta!chain![Proteobactin!(IA034)]![Proteus!mirabilis!HI4320]	28.6	276	170	8	22	798	6	271	1.4e-14	77.8	278	0.956835	VFG044282	pbtl	citrate lyase beta chain	Proteus mirabilis HI4320
26	contig_2_segment0_557	VFG045298(gi:52840987)!(hisH)!imidazole!glycerol!phosphate!synthase!subunit!HisH![LPS!(VF0171)]![Legionella!pneumophila!subsp.!pneumophila!str.!Philadelphia!1]	32.7	220	121	7	109	720	3	211	1.4e-24	110.9	213	0.981221	VFG045298	hisH	imidazole glycerol phosphate synthase subunit HisH	Legionella pneumophila subsp. pneumophila str. Philadelphia 1
27	contig_2_segment0_613	VFG037126(gi:385328078)!(recN)!putative!DNA!repair!protein![Recombinational!repair!protein!(CVF763)]![Neisseria!meningitidis!alpha710]	34	577	344	10	1	1707	1	548	5.1e-59	226.5	557	0.983842	VFG037126	recN	putative DNA repair protein	Neisseria meningitidis alpha710
28	contig_2_segment0_731	VFG013252(gi:33152665)!(msbA)!ABC!transporter!ATP-binding!protein!MsbA![LOS!(CVF494)]![Haemophilus!ducreyi!35000HP]	31.9	576	384	4	115	1836	13	582	7.2e-67	252.7	582	0.979381	VFG013252	msbA	ABC transporter ATP-binding protein MsbA	Haemophilus ducreyi 35000HP
29	contig_2_segment0_767	VFG026433(gi:383308019)!(glnA1)!glutamine!synthetase![Glutamine!synthesis!(CVF311)]![Mycobacterium!tuberculosis!RGTB327]	63.8	450	155	4	1	1335	1	447	1.3e-163	573.5	447	1	VFG026433	glnA1	glutamine synthetase	Mycobacterium tuberculosis RGTB327
30	contig_2_segment0_795	VFG009407(gi:145223515)!(glnA1)!glutamine!synthetase,!type!I![Glutamine!synthesis!(CVF311)]![Mycobacterium!gilvum!PYR-GCK]	66.7	474	155	2	10	1422	5	478	5.1e-190	661.4	478	0.991632	VFG009407	glnA1	glutamine synthetase, type I	Mycobacterium gilvum PYR-GCK
31	contig_2_segment0_874	VFG022851(gi:333992798)!(sodA)!superoxide!dismutase![Iron-cofactored!!SOD!(CVF324)]![Mycobacterium!sp.!JDM601]	68.8	205	64	0	1	615	1	205	4.7e-79	291.6	206	0.995146	VFG022851	sodA	superoxide dismutase	Mycobacterium sp. JDM601
32	contig_2_segment0_875	VFG005341(gi:15674453)!(plr/gapA)!glyceraldehyde-3-phosphate!dehydrogenase![Streptococcal!plasmin!receptor/GAPDH!(CVF123)]![Streptococcus!pyogenes!M1!GAS]	56.9	339	132	7	1	996	1	332	6.1e-97	351.7	336	0.988095	VFG005341	plr/gapA	glyceraldehyde-3-phosphate dehydrogenase	Streptococcus pyogenes M1 GAS
33	contig_2_segment0_888	VFG008678(gi:523914455)!(ddrA)!drrA![PDIM!(phthiocerol!dimycocerosate)!and!PGL!(phenolic!glycolipid)!biosynthesis!and!transport!(CVF288)]![Mycobacterium!yongonense!05-1390]	33.9	313	193	5	52	960	4	312	5.9e-34	142.5	312	0.990385	VFG008678	ddrA	drrA	Mycobacterium yongonense 05-1390
34	contig_2_segment0_906	VFG011211(gi:33599134)!(wbmC)!putative!glutamine!amidotransferase![LPS!(CVF380)]![Bordetella!bronchiseptica!RB50]	32.1	652	376	18	1	1845	1	622	8.7e-82	302.8	628	0.990446	VFG011211	wbmC	putative glutamine amidotransferase	Bordetella bronchiseptica RB50
35	contig_2_segment0_908	VFG039536(gb|NP_820549)!(CBU_1566)!Coxiella!Dot/Icm!type!IVB!secretion!system!translocated!effector!![T4SS!effectors!(CVF803)]![Coxiella!burnetii!RSA!493]	45.9	246	128	4	1	732	1	243	1.1e-53	207.6	244	0.995902	VFG039536	CBU_1566	Coxiella Dot/Icm type IVB secretion system translocated effector	Coxiella burnetii RSA 493
36	contig_2_segment0_915	VFG022965(gi:169629960)!(relA)!GTP!pyrophosphokinase![(p)ppGpp!synthesis!and!hydrolysis!(CVF335)]![Mycobacterium!abscessus!ATCC!19977]	57.6	771	312	5	97	2382	19	783	1.8e-259	892.9	788	0.970812	VFG022965	relA	GTP pyrophosphokinase	Mycobacterium abscessus ATCC 19977
37	contig_2_segment0_938	VFG047692!(FN3523_0020)!aspartate!carbamoyltransferase![Pyrimidine!biosynthesis!(CVF845)]![Francisella!cf.!tularensis!subsp.!novicida!3523]	28.1	327	200	10	10	951	1	305	6.7e-19	92.4	307	0.993485	VFG047692	FN3523_0020	aspartate carbamoyltransferase	Francisella cf. tularensis subsp. novicida 3523
38	contig_2_segment0_939	VFG049120(gb|YP_002918207.1)!(allB)!allantoinase![Allantion!utilization!(VF0572)]![Klebsiella!pneumoniae!subsp.!pneumoniae!NTUH-K2044]	28.4	454	303	10	1	1323	1	445	1.9e-37	154.5	453	0.98234	VFG049120	allB	allantoinase	Klebsiella pneumoniae subsp. pneumoniae NTUH-K2044
39	contig_2_segment0_941	VFG047736!(F7308_0022)!carbamoyl-phosphate!synthase!small!chain![Pyrimidine!biosynthesis!(CVF845)]![Francisella!sp.!TX077308]	44.5	391	194	7	37	1176	10	388	6.4e-85	312	388	0.976804	VFG047736	F7308_0022	carbamoyl-phosphate synthase small chain	Francisella sp. TX077308
40	contig_2_segment0_942	VFG047705!(carB)!carbamoyl!phosphate!synthase!large!subunit![Pyrimidine!biosynthesis!(CVF845)]![Francisella!tularensis!subsp.!holarctica!OSU18]	51.4	1110	500	9	1	3267	1	1091	0	1082	1095	0.996347	VFG047705	carB	carbamoyl phosphate synthase large subunit	Francisella tularensis subsp. holarctica OSU18
41	contig_2_segment0_950	VFG046773!(F7308_1118)!glycosyl!transferase![Capsule!(CVF833)]![Francisella!sp.!TX077308]	25	364	244	8	1	1035	1	354	4.5e-21	99.8	363	0.975207	VFG046773	F7308_1118	glycosyl transferase	Francisella sp. TX077308
42	contig_2_segment0_978	VFG031084(gi:433644988)!(zmp1)!endothelin-converting!enzyme![Zn++!metallophrotease!(CVF655)]![Mycobacterium!smegmatis!JS623]	53.7	650	298	2	10	1950	24	673	5.2e-201	698.4	674	0.964392	VFG031084	zmp1	endothelin-converting enzyme	Mycobacterium smegmatis JS623
43	contig_2_segment0_1012	VFG015549(gi:152983731)!(phzS)!probable!FAD-dependent!monooxygenase![Phenazines!biosynthesis!(CVF536)]![Pseudomonas!aeruginosa!PA7]	43.5	400	207	6	7	1182	7	395	3.2e-79	293.1	402	0.967662	VFG015549	phzS	probable FAD-dependent monooxygenase	Pseudomonas aeruginosa PA7
44	contig_2_segment0_1045	VFG031101(gi:169629269)!(pafA)!hypothetical!protein![Proteasome-associated!proteins!(CVF656)]![Mycobacterium!abscessus!ATCC!19977]	63.6	453	164	1	1	1359	1	452	9.6e-170	594	452	1	VFG031101	pafA	hypothetical protein	Mycobacterium abscessus ATCC 19977
45	contig_2_segment0_1050	VFG031159(gi:333990426)!(mpa)!ATPase![Proteasome-associated!proteins!(CVF656)]![Mycobacterium!sp.!JDM601]	57.9	608	210	8	19	1755	20	610	3.3e-191	665.6	610	0.968852	VFG031159	mpa	ATPase	Mycobacterium sp. JDM601
46	contig_2_segment0_1102	VFG026700(gi:494692156)!(mbtI)!anthranilate!synthase!component!I![Mycobactin!(CVF315)]![Mycobacterium!tuberculosis!str.!Haarlem/NITR202]	52.7	518	225	6	16	1548	6	510	3.6e-136	482.6	516	0.978682	VFG026700	mbtI	anthranilate synthase component I	Mycobacterium tuberculosis str. Haarlem/NITR202
47	contig_2_segment0_1114	VFG046612!(FN3523_1292)!Ribulose-phosphate!3-epimerase![Capsule!(CVF833)]![Francisella!cf.!tularensis!subsp.!novicida!3523]	38.2	212	128	2	13	639	6	217	5.3e-36	148.7	222	0.954955	VFG046612	FN3523_1292	Ribulose-phosphate 3-epimerase	Francisella cf. tularensis subsp. novicida 3523
48	contig_2_segment0_1165	VFG038840(gi:507521851)!(flmH)!3-oxoacyl-ACP!reductase![Polar!flagella!(VF0473)]![Aeromonas!hydrophila!ML09-119]	37.2	234	147	0	616	1317	6	239	3.6e-36	150.2	244	0.959016	VFG038840	flmH	3-oxoacyl-ACP reductase	Aeromonas hydrophila ML09-119
49	contig_2_segment0_1182	VFG038840(gi:507521851)!(flmH)!3-oxoacyl-ACP!reductase![Polar!flagella!(VF0473)]![Aeromonas!hydrophila!ML09-119]	45.5	242	125	2	13	717	2	243	5.5e-55	211.8	244	0.991803	VFG038840	flmH	3-oxoacyl-ACP reductase	Aeromonas hydrophila ML09-119
50	contig_2_segment0_1206	VFG044427(gi:114416732)!(vabA)!2,3-dihydroxybenzoate-2,3-dehydrogenase![Vanchrobactin!(IA025)]![Listonella!anguillarum!RV22]	27.7	253	171	5	46	780	6	254	3.5e-13	73.2	258	0.965116	VFG044427	vabA	2,3-dihydroxybenzoate-2,3-dehydrogenase	Listonella anguillarum RV22
51	contig_2_segment0_1226	VFG006495(gi:109948025)!(ureG)!urease!accessory!protein!UreG![Urease!(CVF221)]![Helicobacter!acinonychis!str.!Sheeba]	63.6	198	72	0	13	606	2	199	5.2e-75	278.1	199	0.994975	VFG006495	ureG	urease accessory protein UreG	Helicobacter acinonychis str. Sheeba
52	contig_2_segment0_1229	VFG006476(gi:32265907)!(ureB)!urease![Urease!(CVF221)]![Helicobacter!hepaticus!ATCC!51449]	62.5	579	204	3	421	2151	2	569	8.5e-213	737.6	569	0.998243	VFG006476	ureB	urease	Helicobacter hepaticus ATCC 51449
53	contig_2_segment0_1254	VFG031731(gi:126433265)!(regX3)!two!component!transcriptional!regulator![RegX3!(CVF667)]![Mycobacterium!sp.!JLS]	36.2	221	136	2	1	648	5	225	1.1e-38	157.5	228	0.969298	VFG031731	regX3	two component transcriptional regulator	Mycobacterium sp. JLS
54	contig_2_segment0_1262	VFG023911(gi:315443822)!(kasB)!3-oxoacyl-ACP!synthase![FAS-II!(CVF300)]![Mycobacterium!gilvum!Spyr1]	43.3	416	218	10	16	1242	12	416	3.6e-70	263.1	417	0.971223	VFG023911	kasB	3-oxoacyl-ACP synthase	Mycobacterium gilvum Spyr1
55	contig_2_segment0_1265	VFG013568(gi:68248709)!(hitB)!iron(III)-transport!system!permease!protein!hFbpB![Haemophilus!iron!transport!locus!(CVF501)]![Haemophilus!influenzae!86-028NP]	35.5	501	315	4	79	1569	4	500	1.6e-75	281.2	506	0.982213	VFG013568	hitB	iron(III)-transport system permease protein hFbpB	Haemophilus influenzae 86-028NP
56	contig_2_segment0_1266	VFG006259(gi:59800668)!(fbpC)!ABC!transporter,!ATP-binding!protein,!iron!related![ABC!transporter!(CVF197)]![Neisseria!gonorrhoeae!FA!1090]	40.4	361	192	6	76	1140	5	348	1.9e-62	237.3	352	0.977273	VFG006259	fbpC	ABC transporter, ATP-binding protein, iron related	Neisseria gonorrhoeae FA 1090
57	contig_2_segment0_1268	VFG022925(gi:333989463)!(prrA)!two-component!response!transcriptional!regulatory!protein!PrrA![PrrA/B!(CVF332)]![Mycobacterium!sp.!JDM601]	38.6	228	126	6	4	651	6	231	5.1e-31	132.1	236	0.957627	VFG022925	prrA	two-component response transcriptional regulatory protein PrrA	Mycobacterium sp. JDM601
58	contig_2_segment0_1307	VFG047143!(wbtF)!NAD!dependent!epimerase![LPS!(CVF834)]![Francisella!novicida!U112]	25.2	317	196	12	67	915	15	324	6.5e-11	65.9	324	0.95679	VFG047143	wbtF	NAD dependent epimerase	Francisella novicida U112
59	contig_2_segment0_1322	VFG031508(gi:523913029)!(ndk)!nucleoside!diphosphate!kinase![Nucleoside!diphosphate!kinase!(CVF660)]![Mycobacterium!yongonense!05-1390]	68.1	135	38	2	10	411	3	133	1.4e-44	176.4	136	0.963235	VFG031508	ndk	nucleoside diphosphate kinase	Mycobacterium yongonense 05-1390
60	contig_2_segment0_1339	VFG005552(gi:125718786)!(tig/ropA)!Trigger!factor,!putative![Trigger!factor!(CVF149)]![Streptococcus!sanguinis!SK36]	28.4	430	277	10	16	1239	6	426	4e-35	146.7	427	0.985948	VFG005552	tig/ropA	Trigger factor, putative	Streptococcus sanguinis SK36
61	contig_2_segment0_1407	VFG048851!(gnd)!6-phosphogluconate!dehydrogenase![Capsule!(CVF854)]![Klebsiella!pneumoniae!subsp.!pneumoniae!MGH!78578]	56.7	464	197	4	10	1395	5	466	3.4e-141	499.2	468	0.987179	VFG048851	gnd	6-phosphogluconate dehydrogenase	Klebsiella pneumoniae subsp. pneumoniae MGH 78578
62	contig_2_segment0_1453	VFG009135(gi:383308045)!(kasB)!3-oxoacyl-(acyl!carrier!protein)!synthase!II![FAS-II!(CVF300)]![Mycobacterium!tuberculosis!RGTB327]	45.2	409	217	3	13	1236	14	416	8.9e-98	354.8	416	0.96875	VFG009135	kasB	3-oxoacyl-(acyl carrier protein) synthase II	Mycobacterium tuberculosis RGTB327
63	contig_2_segment0_1504	VFG007633(gi:15640934)!(wecC)!UDP-N-acetyl-D-mannosaminuronic!acid!dehydrogenase![Capsular!polysaccharide!(CVF282)]![Vibrio!cholerae!O1!biovar!El!Tor!str.!N16961]	55.6	408	177	4	58	1275	5	410	1.8e-117	420.2	413	0.983051	VFG007633	wecC	UDP-N-acetyl-D-mannosaminuronic acid dehydrogenase	Vibrio cholerae O1 biovar El Tor str. N16961
64	contig_2_segment0_1522	VFG009376(gi:118470522)!(leuD)!3-isopropylmalate!dehydratase,!small!subunit![Leucine!synthesis!(CVF309)]![Mycobacterium!smegmatis!str.!MC2!155]	75.1	197	49	0	1	591	1	197	5.3e-88	321.2	197	1	VFG009376	leuD	3-isopropylmalate dehydratase, small subunit	Mycobacterium smegmatis str. MC2 155
65	contig_2_segment0_1530	VFG009135(gi:383308045)!(kasB)!3-oxoacyl-(acyl!carrier!protein)!synthase!II![FAS-II!(CVF300)]![Mycobacterium!tuberculosis!RGTB327]	46.2	405	214	3	13	1221	13	415	8.8e-90	328.2	416	0.96875	VFG009135	kasB	3-oxoacyl-(acyl carrier protein) synthase II	Mycobacterium tuberculosis RGTB327
66	contig_2_segment0_1535	VFG024200(gi:406033401)!(devR/dosR)!two-component!system!response!regulator![DevR/S!(CVF334)]![Mycobacterium!indicus!pranii!MTCC!9506]	42.1	235	117	5	1	702	1	217	1.9e-39	160.2	218	0.995413	VFG024200	devR/dosR	two-component system response regulator	Mycobacterium indicus pranii MTCC 9506
67	contig_2_segment0_1554	VFG037008(gi:313667899)!(mtrD)!drug!efflux!protein![MtrCDE!(CVF759)]![Neisseria!lactamica!020-06]	27	1059	675	27	49	3039	14	1036	4.9e-60	230.7	1067	0.958763	VFG037008	mtrD	drug efflux protein	Neisseria lactamica 020-06
68	contig_2_segment0_1579	VFG013269(gi:33152420)!(orfM)!putative!deoxyribonucleotide!triphosphate!pyrophosphatase![LOS!(CVF494)]![Haemophilus!ducreyi!35000HP]	41.3	196	107	2	37	624	5	192	1e-31	134.4	196	0.959184	VFG013269	orfM	putative deoxyribonucleotide triphosphate pyrophosphatase	Haemophilus ducreyi 35000HP
69	contig_2_segment0_1604	VFG041785(gi:46562141)!(DVUA0119)!type!III!secretion!system!ATPase![T3SS!(SS039)]![Desulfovibrio!vulgaris!str.!Hildenborough]	29.2	435	280	13	88	1359	20	437	1.1e-34	145.6	438	0.954338	VFG041785	DVUA0119	type III secretion system ATPase	Desulfovibrio vulgaris str. Hildenborough
70	contig_2_segment0_1613	VFG014133(gi:152989709)!(PSPA7_1984)!UDP-glucose!4-epimerase!(Galactowaldenase)!(UDP-galactose4-epimerase)![LPS!O-antigen!(P.!aeruginosa)!(CVF520)]![Pseudomonas!aeruginosa!PA7]	40.6	315	181	2	4	945	3	312	3.2e-55	213	318	0.974843	VFG014133	PSPA7_1984	UDP-glucose 4-epimerase (Galactowaldenase) (UDP-galactose4-epimerase)	Pseudomonas aeruginosa PA7
71	contig_2_segment0_1635	VFG049122(gb|YP_002918211.1)!(allC)!allantoate!amidohydrolase![Allantion!utilization!(VF0572)]![Klebsiella!pneumoniae!subsp.!pneumoniae!NTUH-K2044]	29.6	405	259	9	37	1212	16	407	2.7e-38	157.1	411	0.953771	VFG049122	allC	allantoate amidohydrolase	Klebsiella pneumoniae subsp. pneumoniae NTUH-K2044
72	contig_2_segment0_1662	VFG026490(gi:433647323)!(ideR)!Mn-dependent!transcriptional!regulator![Iron-dependent!regulator!(CVF314)]![Mycobacterium!smegmatis!JS623]	32.7	226	133	6	663	19	9	226	1.4e-17	87.8	229	0.951965	VFG026490	ideR	Mn-dependent transcriptional regulator	Mycobacterium smegmatis JS623
73	contig_2_segment0_1690	VFG000035(gb|NP_878992)!(bplD)!UDP-N-acetylglucosamine!2-epimerase![LPS!(VF0033)]![Bordetella!pertussis!Tohama!I]	50.3	358	165	8	4	1044	4	359	1.4e-88	323.9	362	0.983425	VFG000035	bplD	UDP-N-acetylglucosamine 2-epimerase	Bordetella pertussis Tohama I
74	contig_2_segment0_1693	VFG014103(gi:15598351)!(wbpE)!probable!aminotransferase!WbpE![LPS!O-antigen!(P.!aeruginosa)!(CVF520)]![Pseudomonas!aeruginosa!PAO1]	35.7	347	216	6	37	1065	14	357	2.5e-51	200.3	359	0.958217	VFG014103	wbpE	probable aminotransferase WbpE	Pseudomonas aeruginosa PAO1
75	contig_2_segment0_1694	VFG014102(gi:15598352)!(wbpD)!probable!acetyltransferase!WbpD![LPS!O-antigen!(P.!aeruginosa)!(CVF520)]![Pseudomonas!aeruginosa!PAO1]	50	198	89	4	1	588	1	190	3.2e-16	82.8	191	0.994764	VFG014102	wbpD	probable acetyltransferase WbpD	Pseudomonas aeruginosa PAO1
76	contig_2_segment0_1697	VFG005934(gi:125718319)!(rgpC)!ABC-type!lipopolysaccharide!transport!system,!permease!component,!putative![Capsule!(CVF186)]![Streptococcus!sanguinis!SK36]	27.1	266	190	2	64	861	7	268	5.9e-24	109	268	0.977612	VFG005934	rgpC	ABC-type lipopolysaccharide transport system, permease component, putative	Streptococcus sanguinis SK36
77	contig_2_segment0_1699	VFG026318(gi:206561579)!(BCAL3235)!putative!UDP-galactopyranose!mutase![Capsule!I!(CVF645)]![Burkholderia!cenocepacia!J2315]	44.1	390	205	6	13	1182	4	380	1.1e-92	337.8	383	0.984334	VFG026318	BCAL3235	putative UDP-galactopyranose mutase	Burkholderia cenocepacia J2315
78	contig_2_segment0_1720	VFG031729(gi:145220688)!(regX3)!two!component!transcriptional!regulator![RegX3!(CVF667)]![Mycobacterium!gilvum!PYR-GCK]	47.7	222	111	1	13	663	4	225	5.6e-54	208.4	228	0.973684	VFG031729	regX3	two component transcriptional regulator	Mycobacterium gilvum PYR-GCK
79	contig_2_segment0_1755	VFG013618(gi:113461372)!(hemL)!glutamate-1-semialdehyde!aminotransferase![Heme!biosynthesis!(CVF506)]![Haemophilus!somnus!129PT]	49.5	430	205	4	1	1278	1	422	1.1e-106	384.4	432	0.976852	VFG013618	hemL	glutamate-1-semialdehyde aminotransferase	Haemophilus somnus 129PT
80	contig_2_segment0_1758	VFG038840(gi:507521851)!(flmH)!3-oxoacyl-ACP!reductase![Polar!flagella!(VF0473)]![Aeromonas!hydrophila!ML09-119]	29.8	245	149	3	28	732	9	240	1.2e-20	97.8	244	0.95082	VFG038840	flmH	3-oxoacyl-ACP reductase	Aeromonas hydrophila ML09-119
81	contig_2_segment0_1769	VFG044378(gi:28192388)!(qbsC)!QbsC![thioquinolobactin!(IA009)]![Pseudomonas!fluorescens!ATCC!17400]	54.1	399	163	4	28	1206	3	387	1.1e-113	407.5	387	0.994832	VFG044378	qbsC	QbsC	Pseudomonas fluorescens ATCC 17400
82	contig_2_segment0_1808	VFG016387(gi:42784426)!(galE)!UDP-glucose!4-epimerase![Polysaccharide!capsule!(CVF567)]![Bacillus!cereus!ATCC!10987]	56.4	335	146	0	1	1005	1	335	3.4e-111	399.1	338	0.991124	VFG016387	galE	UDP-glucose 4-epimerase	Bacillus cereus ATCC 10987
83	contig_2_segment0_1834	VFG044260(gi:151220278)!(sbnG)!2-dehydro-3-deoxyglucarate!aldolase![staphyloferrin!B!(IA027)]![Staphylococcus!aureus!subsp.!aureus!str.!Newman]	31.4	258	171	4	22	789	6	259	6.9e-22	102.1	259	0.980695	VFG044260	sbnG	2-dehydro-3-deoxyglucarate aldolase	Staphylococcus aureus subsp. aureus str. Newman
84	contig_2_segment0_1878	VFG016382(gi:30023307)!(BC5275)!UTP--glucose-1-phosphate!uridylyltransferase![Polysaccharide!capsule!(CVF567)]![Bacillus!cereus!ATCC!14579]	50	290	137	4	13	879	2	284	1.4e-73	273.9	293	0.96587	VFG016382	BC5275	UTP--glucose-1-phosphate uridylyltransferase	Bacillus cereus ATCC 14579
85	contig_2_segment0_1886	VFG021858(gi:118472346)!(exiT)!ABC!transporter!permease![exochelin!(IA032)]![Mycobacterium!smegmatis!str.!MC2!155]	29	559	373	7	85	1713	25	575	4.3e-50	196.8	575	0.958261	VFG021858	exiT	ABC transporter permease	Mycobacterium smegmatis str. MC2 155
86	contig_2_segment0_1887	VFG021859(gi:118472884)!(exiT)!ABC!transporter!permease![exochelin!(IA032)]![Mycobacterium!smegmatis!str.!MC2!155]	38.2	581	343	7	94	1809	12	585	1.4e-86	318.2	589	0.974533	VFG021859	exiT	ABC transporter permease	Mycobacterium smegmatis str. MC2 155
87	contig_2_segment0_1908	VFG043550(gi:15607581)!(Rv0440)!chaperonin!GroEL![GroEL(Hsp60)/Cpn60.2!(AI353)]![Mycobacterium!tuberculosis!H37Rv]	65.4	529	178	2	1	1584	1	525	2.3e-186	649.4	540	0.972222	VFG043550	Rv0440	chaperonin GroEL	Mycobacterium tuberculosis H37Rv
88	contig_2_segment0_1943	VFG013515(gi:148826007)!(mrsA/glmM)!predicted!phosphomannomutase![Exopolysaccharide!(CVF495)]![Haemophilus!influenzae!PittEE]	45.4	445	234	6	7	1332	5	443	2.8e-97	353.2	445	0.986517	VFG013515	mrsA/glmM	predicted phosphomannomutase	Haemophilus influenzae PittEE
89	contig_2_segment0_1956	VFG030565(gi:31793499)!(sugA)!sugar-transport!integral!membrane!protein!ABC!transporter!UspA![Trehalose-recycling!ABC!transporter!(CVF651)]![Mycobacterium!bovis!AF2122/97]	34.9	289	179	5	118	978	6	287	7.7e-36	148.7	290	0.972414	VFG030565	sugA	sugar-transport integral membrane protein ABC transporter UspA	Mycobacterium bovis AF2122/97
90	contig_2_segment0_1957	VFG030623(gi:145224435)!(sugB)!binding-protein-dependent!transport!systems!inner!membrane!component![Trehalose-recycling!ABC!transporter!(CVF651)]![Mycobacterium!gilvum!PYR-GCK]	32.4	272	177	2	58	867	9	275	8.3e-34	141.7	275	0.970909	VFG030623	sugB	binding-protein-dependent transport systems inner membrane component	Mycobacterium gilvum PYR-GCK
91	contig_2_segment0_1984	VFG046459!(Fphi_1039)!elongation!factor!Tu![EF-Tu!(CVF827)]![Francisella!philomiragia!subsp.!philomiragia!ATCC!25017]	69.9	396	117	1	1	1188	1	394	1.2e-163	573.5	394	1	VFG046459	Fphi_1039	elongation factor Tu	Francisella philomiragia subsp. philomiragia ATCC 25017
92	contig_2_segment0_2019	VFG031738(gi:169631126)!(regX3)!Sensory!transduction!protein!RegX3![RegX3!(CVF667)]![Mycobacterium!abscessus!ATCC!19977]	36.2	224	133	6	13	657	4	226	3e-26	116.3	228	0.97807	VFG031738	regX3	Sensory transduction protein RegX3	Mycobacterium abscessus ATCC 19977
93	contig_2_segment0_2042	VFG044282(gi:197284140)!(pbtl)!citrate!lyase!beta!chain![Proteobactin!(IA034)]![Proteus!mirabilis!HI4320]	32.4	272	159	8	64	822	6	271	3.6e-29	126.3	278	0.956835	VFG044282	pbtl	citrate lyase beta chain	Proteus mirabilis HI4320
94	contig_2_segment0_2057	VFG018395(gi:161503675)!(phoP)!hypothetical!protein![PhoPQ!(CVF010)]![Salmonella!enterica!subsp.!arizonae!serovar!62:z4,z23:--!str.!RSK2980]	40.7	226	127	5	1	669	1	222	1.8e-39	160.2	224	0.991071	VFG018395	phoP	hypothetical protein	Salmonella enterica subsp. arizonae serovar 62:z4,z23:-- str. RSK2980
95	contig_2_segment0_2068	VFG015853(gi:152989451)!(plcN)!phospholipase!C,!phosphocholine-specific![Non-hemolytic!phospholipase!C!(CVF541)]![Pseudomonas!aeruginosa!PA7]	37.6	736	356	19	58	2133	5	681	4e-122	436.4	692	0.978324	VFG015853	plcN	phospholipase C, phosphocholine-specific	Pseudomonas aeruginosa PA7
96	contig_2_segment0_2072	VFG000077(gb|NP_465991)!(clpP)!ATP-dependent!Clp!protease!proteolytic!subunit![ClpP!(VF0074)]![Listeria!monocytogenes!EGD-e]	48.4	190	98	0	16	585	4	193	3.4e-47	185.7	198	0.959596	VFG000077	clpP	ATP-dependent Clp protease proteolytic subunit	Listeria monocytogenes EGD-e
97	contig_2_segment0_2091	VFG030400(gi:333989012)!(fadD13)!fatty-acid--CoA!ligase![MymA!operon!(CVF649)]![Mycobacterium!sp.!JDM601]	34.9	490	282	11	193	1656	1	455	2.7e-73	273.9	464	0.980603	VFG030400	fadD13	fatty-acid--CoA ligase	Mycobacterium sp. JDM601
98	contig_2_segment0_2113	VFG026864(gi:507421333)!(katG)!catalase/peroxidase!HPI![Catalase-peroxidase!(CVF321)]![Mycobacterium!abscessus!subsp.!bolletii!50594]	65	722	244	5	25	2169	19	738	9.3e-284	973.4	738	0.97561	VFG026864	katG	catalase/peroxidase HPI	Mycobacterium abscessus subsp. bolletii 50594
99	contig_2_segment0_2158	VFG031747(gi:406032839)!(regX3)!Sensory!transduction!protein!regX3![RegX3!(CVF667)]![Mycobacterium!indicus!pranii!MTCC!9506]	44.3	228	116	3	1	663	1	224	1.1e-46	184.1	227	0.986784	VFG031747	regX3	Sensory transduction protein regX3	Mycobacterium indicus pranii MTCC 9506
100	contig_2_segment0_2165	VFG038840(gi:507521851)!(flmH)!3-oxoacyl-ACP!reductase![Polar!flagella!(VF0473)]![Aeromonas!hydrophila!ML09-119]	38.8	242	139	5	10	720	3	240	9.9e-34	141.4	244	0.97541	VFG038840	flmH	3-oxoacyl-ACP reductase	Aeromonas hydrophila ML09-119
101	contig_2_segment0_2183	VFG030565(gi:31793499)!(sugA)!sugar-transport!integral!membrane!protein!ABC!transporter!UspA![Trehalose-recycling!ABC!transporter!(CVF651)]![Mycobacterium!bovis!AF2122/97]	33.1	284	184	2	19	870	11	288	3.6e-37	152.9	290	0.958621	VFG030565	sugA	sugar-transport integral membrane protein ABC transporter UspA	Mycobacterium bovis AF2122/97
102	contig_2_segment0_2273	VFG013249(gi:68248611)!(msbA)!lipid!A!export!ATP-binding!protein!MsbA![LOS!(CVF494)]![Haemophilus!influenzae!86-028NP]	28.6	583	390	7	31	1761	16	578	2.5e-56	217.6	587	0.959114	VFG013249	msbA	lipid A export ATP-binding protein MsbA	Haemophilus influenzae 86-028NP
103	contig_2_segment0_2278	VFG009331(gi:118471351)!(purC)!phosphoribosylaminoimidazole-succinocarboxamide!synthase![Purine!synthesis!(CVF306)]![Mycobacterium!smegmatis!str.!MC2!155]	53.7	296	127	3	31	906	5	294	1.9e-92	336.7	299	0.9699	VFG009331	purC	phosphoribosylaminoimidazole-succinocarboxamide synthase	Mycobacterium smegmatis str. MC2 155
104	contig_2_segment0_2286	VFG038839(gb|YP_858598)!(flmH)!short!chain!dehydrogenase/reductase!family!oxidoreductase![Polar!flagella!(CVF786)]![Aeromonas!hydrophila!subsp.!hydrophila!ATCC!7966]	31.3	249	162	4	37	768	3	247	2.7e-15	80.1	249	0.983936	VFG038839	flmH	short chain dehydrogenase/reductase family oxidoreductase	Aeromonas hydrophila subsp. hydrophila ATCC 7966
105	contig_2_segment0_2348	VFG016303(gi:16078902)!(capD)!gamma-glutamyltranspeptidase![Polyglutamic!acid!capsule!(CVF566)]![Bacillus!subtilis!subsp.!subtilis!str.!168]	36.9	591	345	9	43	1803	13	579	7.7e-90	328.9	587	0.965928	VFG016303	capD	gamma-glutamyltranspeptidase	Bacillus subtilis subsp. subtilis str. 168
106	contig_2_segment0_2391	VFG049191!(A79E_1186)!ClpB!protein![T6SS-II!(CVF861)]![Klebsiella!pneumoniae!subsp.!pneumoniae!1084]	52.4	853	398	4	10	2562	5	851	5.9e-237	818.1	857	0.988331	VFG049191	A79E_1186	ClpB protein	Klebsiella pneumoniae subsp. pneumoniae 1084
107	contig_2_segment0_2395	VFG009866(gi:126437246)!(mprA)!two!component!transcriptional!regulator,!winged!helix!family![MprA/B!(CVF333)]![Mycobacterium!sp.!JLS]	39.4	221	128	2	1	645	3	223	3e-39	159.5	230	0.96087	VFG009866	mprA	two component transcriptional regulator, winged helix family	Mycobacterium sp. JLS
108	contig_2_segment0_2411	VFG038840(gi:507521851)!(flmH)!3-oxoacyl-ACP!reductase![Polar!flagella!(VF0473)]![Aeromonas!hydrophila!ML09-119]	37	243	144	5	34	759	9	243	3e-35	146.4	244	0.963115	VFG038840	flmH	3-oxoacyl-ACP reductase	Aeromonas hydrophila ML09-119
109	contig_2_segment0_2533	VFG030630(gi:120403530)!(sugB)!binding-protein-dependent!transport!system!inner!membrane!protein![Trehalose-recycling!ABC!transporter!(CVF651)]![Mycobacterium!vanbaalenii!PYR-1]	33.1	272	172	4	112	915	9	274	3.8e-29	126.3	275	0.967273	VFG030630	sugB	binding-protein-dependent transport system inner membrane protein	Mycobacterium vanbaalenii PYR-1
110	contig_2_segment0_2575	VFG030115(gi:126435471)!(kefB)!sodium/hydrogen!exchanger![Potassium/proton!antiporter!(CVF647)]![Mycobacterium!sp.!JLS]	49.3	371	185	1	13	1125	5	372	1.9e-81	300.4	384	0.958333	VFG030115	kefB	sodium/hydrogen exchanger	Mycobacterium sp. JLS
111	contig_2_segment0_2581	VFG005766(gi:25010702)!(cylG)!hypothetical!protein![Beta-hemolysin/cytolysin!(CVF171)]![Streptococcus!agalactiae!NEM316]	29	245	158	6	22	741	3	236	2.3e-17	87	240	0.975	VFG005766	cylG	hypothetical protein	Streptococcus agalactiae NEM316
112	contig_2_segment0_2598	VFG013732(gi:25027240)!(fagC)!putative!iron!transporter!ATP-binding!protein![ABC!transporter!(CVF516)]![Corynebacterium!efficiens!YS-314]	60	260	104	0	10	789	7	266	4.8e-84	308.5	272	0.955882	VFG013732	fagC	putative iron transporter ATP-binding protein	Corynebacterium efficiens YS-314
113	contig_2_segment0_2634	VFG030302(gi:333990991)!(adhD)!zinc-containing!alcohol!dehydrogenase!NAD-!dependent!AdhD![MymA!operon!(CVF649)]![Mycobacterium!sp.!JDM601]	39.1	348	206	5	52	1080	14	360	1.6e-58	224.2	363	0.955923	VFG030302	adhD	zinc-containing alcohol dehydrogenase NAD- dependent AdhD	Mycobacterium sp. JDM601
114	contig_2_segment0_2665	VFG016506(gi:71894295)!(pdhB)!pyruvate!dehydrogenase!E1!component,!beta!subunit![PDH-B!(CVF588)]![Mycoplasma!synoviae!53]	42	324	186	2	7	978	8	329	5.6e-71	265.4	331	0.97281	VFG016506	pdhB	pyruvate dehydrogenase E1 component, beta subunit	Mycoplasma synoviae 53
115	contig_2_segment0_2696	VFG015091(gi:146307398)!(gacA)!two!component!transcriptional!regulator,!LuxR!family![GacS/GacA!two-component!system!(CVF529)]![Pseudomonas!mendocina!ymp]	35	220	131	2	46	702	2	210	1e-29	127.9	214	0.976636	VFG015091	gacA	two component transcriptional regulator, LuxR family	Pseudomonas mendocina ymp
116	contig_2_segment0_2838	VFG000079(gb|NP_463763)!(clpC)!endopeptidase!Clp!ATP-binding!chain!C![ClpC!(VF0072)]![Listeria!monocytogenes!EGD-e]	61.5	806	299	4	1	2418	2	796	1e-281	966.8	820	0.969512	VFG000079	clpC	endopeptidase Clp ATP-binding chain C	Listeria monocytogenes EGD-e
117	contig_2_segment0_2863	VFG043408(gi:42780821)!(cheY)!chemotaxis!response!regulator![peritrichous!flagella!(AI153)]![Bacillus!cereus!ATCC!10987]	30.3	119	83	0	7	363	4	122	1.8e-12	70.5	122	0.97541	VFG043408	cheY	chemotaxis response regulator	Bacillus cereus ATCC 10987
118	contig_2_segment0_2884	VFG044201(gi:66045819)!(ascF)!diaminobutyrate--2-oxoglutarate!aminotransferase![achromobactin!(IA003)]![Pseudomonas!syringae!pv.!syringae!B728a]	33.3	448	270	15	73	1365	17	452	8e-47	185.7	458	0.951965	VFG044201	ascF	diaminobutyrate--2-oxoglutarate aminotransferase	Pseudomonas syringae pv. syringae B728a
119	contig_2_segment0_2932	VFG015930(gi:70729947)!(hcnC)!hydrogen!cyanide!synthase!HcnC![Hydrogen!cyanide!production!(CVF549)]![Pseudomonas!fluorescens!Pf-5]	28.7	429	246	9	1	1161	1	411	1.9e-33	141	417	0.985612	VFG015930	hcnC	hydrogen cyanide synthase HcnC	Pseudomonas fluorescens Pf-5
120	contig_2_segment0_2954	VFG044219(gi:47530636)!(fhuC)!iron!compound!ABC!transporter!ATP-binding!protein![petrobactin!(IA028)]![Bacillus!anthracis!str.!Ames!Ancestor]	53.6	250	116	0	1	750	1	250	1.1e-71	267.3	250	1	VFG044219	fhuC	iron compound ABC transporter ATP-binding protein	Bacillus anthracis str. Ames Ancestor
121	contig_2_segment0_3051	VFG005766(gi:25010702)!(cylG)!hypothetical!protein![Beta-hemolysin/cytolysin!(CVF171)]![Streptococcus!agalactiae!NEM316]	31.6	244	157	4	43	768	2	237	8.3e-25	111.7	240	0.983333	VFG005766	cylG	hypothetical protein	Streptococcus agalactiae NEM316
122	contig_2_segment0_3067	VFG044255(gi:151220273)!(sbnB)!ornithine!cyclodeaminase![staphyloferrin!B!(IA027)]![Staphylococcus!aureus!subsp.!aureus!str.!Newman]	22.3	327	240	6	25	978	14	335	6.8e-16	82.4	336	0.958333	VFG044255	sbnB	ornithine cyclodeaminase	Staphylococcus aureus subsp. aureus str. Newman
123	contig_2_segment0_3070	VFG044339(gi:292489702)!(dfoA)!L-lysine!6-monooxygenase!involved!in!desferrioxamine!biosynthesis![desferrioxamine!(IA033)]![Erwinia!amylovora!CFBP1430]	60.2	427	157	5	34	1296	5	424	5.9e-143	505	430	0.976744	VFG044339	dfoA	L-lysine 6-monooxygenase involved in desferrioxamine biosynthesis	Erwinia amylovora CFBP1430
124	contig_2_segment0_3094	VFG030630(gi:120403530)!(sugB)!binding-protein-dependent!transport!system!inner!membrane!protein![Trehalose-recycling!ABC!transporter!(CVF651)]![Mycobacterium!vanbaalenii!PYR-1]	50.4	268	127	3	76	870	10	274	5.4e-65	245.4	275	0.963636	VFG030630	sugB	binding-protein-dependent transport system inner membrane protein	Mycobacterium vanbaalenii PYR-1
125	contig_2_segment0_3127	VFG030400(gi:333989012)!(fadD13)!fatty-acid--CoA!ligase![MymA!operon!(CVF649)]![Mycobacterium!sp.!JDM601]	37.2	468	274	8	181	1566	2	455	2.6e-70	263.8	464	0.978448	VFG030400	fadD13	fatty-acid--CoA ligase	Mycobacterium sp. JDM601
126	contig_2_segment0_3172	VFG022587(gi:333989098)!(icl)!isocitrate!lyase!Icl![Isocitrate!lyase!(CVF302)]![Mycobacterium!sp.!JDM601]	79.1	431	82	2	22	1314	6	428	1.5e-199	693	428	0.988318	VFG022587	icl	isocitrate lyase Icl	Mycobacterium sp. JDM601
127	contig_2_segment0_3215	VFG043004(gi:304364194)!(fimA)!surface-anchored!fimbrial!subunit![Type!2!pili!(AI136)]![Actinomyces!viscosus!C505]	33	542	274	22	1	1398	1	529	4.9e-44	176.4	535	0.988785	VFG043004	fimA	surface-anchored fimbrial subunit	Actinomyces viscosus C505
128	contig_2_segment0_3230	VFG030295(gi:118619910)!(adhD)!zinc-type!alcohol!dehydrogenase!AdhD![MymA!operon!(CVF649)]![Mycobacterium!ulcerans!Agy99]	35.1	379	221	5	25	1089	4	381	2.9e-52	203.4	385	0.981818	VFG030295	adhD	zinc-type alcohol dehydrogenase AdhD	Mycobacterium ulcerans Agy99
129	contig_2_segment0_3257	VFG009805(gi:145222173)!(phoP)!two!component!transcriptional!regulator,!winged!helix!family![PhoP/R!(CVF331)]![Mycobacterium!gilvum!PYR-GCK]	49.1	230	114	2	46	726	6	235	8e-62	234.6	238	0.966387	VFG009805	phoP	two component transcriptional regulator, winged helix family	Mycobacterium gilvum PYR-GCK
130	contig_2_segment0_3283	VFG013188(gi:170717277)!(manB)!Phosphomannomutase![Exopolysaccharide!(CVF495)]![Haemophilus!somnus!2336]	40.7	462	256	8	40	1413	7	454	4.1e-83	306.2	454	0.986784	VFG013188	manB	Phosphomannomutase	Haemophilus somnus 2336
131	contig_2_segment0_3299	VFG030155(gi:145223491)!(caeA)!TAP!domain-containing!protein![Carboxylesterase!(CVF648)]![Mycobacterium!gilvum!PYR-GCK]	36.6	478	274	11	232	1599	25	495	4.3e-76	283.1	495	0.951515	VFG030155	caeA	TAP domain-containing protein	Mycobacterium gilvum PYR-GCK
132	contig_2_segment0_3307	VFG031677(gi:118471880)!(senX3)!sensor!histidine!kinase!SenX3![SenX3!(CVF666)]![Mycobacterium!smegmatis!str.!MC2!155]	43.2	375	204	5	34	1146	7	376	8.4e-72	268.5	384	0.963542	VFG031677	senX3	sensor histidine kinase SenX3	Mycobacterium smegmatis str. MC2 155
133	contig_2_segment0_3308	VFG031747(gi:406032839)!(regX3)!Sensory!transduction!protein!regX3![RegX3!(CVF667)]![Mycobacterium!indicus!pranii!MTCC!9506]	74.8	226	56	1	1	675	1	226	1.9e-94	342.8	227	0.995595	VFG031747	regX3	Sensory transduction protein regX3	Mycobacterium indicus pranii MTCC 9506

## Sheet: Sheet2
	qseqid	sseqid	pident	length	mismatch	gap	qstart	qend	sstart	send	evalue	bitscore	slen	coverage		VFGID	gene	protein function	bacteria origin
0	contig_2_segment0_2	VFG015379(gi:152986872)!(PSPA7_0144)!probable!ATP-binding!component!of!ABC!transporter![Hcp!secretion!island-1!encoded!type!VI!secretion!system!(H-T6SS)!(CVF535)]![Pseudomonas!aeruginosa!PA7]	37.4	243	130	6	7	687	1	237	1.7e-24	110.5	239	0.991632	0.350954	VFG015379	PSPA7_0144	probable ATP-binding component of ABC transporter	Pseudomonas aeruginosa PA7
1	contig_2_segment0_61	VFG018402(gi:161505694)!(mgtB)!hypothetical!protein![Mg2+!transport!(CVF005)]![Salmonella!enterica!subsp.!arizonae!serovar!62:z4,z23:--!str.!RSK2980]	50.8	888	413	10	106	2742	35	907	7.2e-241	831.2	908	0.961454	0.344331	VFG018402	mgtB	hypothetical protein	Salmonella enterica subsp. arizonae serovar 62:z4,z23:-- str. RSK2980
2	contig_2_segment0_62	VFG022673(gi:169630673)!(mgtC)!Mg2+!transport!P-type!ATPase!C!MgtC![Magnesium!transport!(CVF313)]![Mycobacterium!abscessus!ATCC!19977]	58.7	230	91	3	1	684	1	228	2.9e-61	232.6	240	0.95	0.350877	VFG022673	mgtC	Mg2+ transport P-type ATPase C MgtC	Mycobacterium abscessus ATCC 19977
3	contig_2_segment0_93	VFG043550(gi:15607581)!(Rv0440)!chaperonin!GroEL![GroEL(Hsp60)/Cpn60.2!(AI353)]![Mycobacterium!tuberculosis!H37Rv]	85.5	539	76	2	1	1614	1	538	8.8e-247	850.1	540	0.996296	0.334572	VFG043550	Rv0440	chaperonin GroEL	Mycobacterium tuberculosis H37Rv
4	contig_2_segment0_97	VFG009807(gi:126437538)!(phoP)!two!component!transcriptional!regulator,!winged!helix!family![PhoP/R!(CVF331)]![Mycobacterium!sp.!JLS]	58.5	236	94	2	1	702	3	236	3.4e-73	272.3	239	0.979079	0.340456	VFG009807	phoP	two component transcriptional regulator, winged helix family	Mycobacterium sp. JLS
5	contig_2_segment0_101	VFG026467(gi:507421907)!(ideR)!iron-dependent!repressor!and!activator!IdeR![Iron-dependent!regulator!(CVF314)]![Mycobacterium!abscessus!subsp.!bolletii!50594]	58.7	230	88	3	1	684	1	225	1.9e-65	246.5	228	0.986842	0.333333	VFG026467	ideR	iron-dependent repressor and activator IdeR	Mycobacterium abscessus subsp. bolletii 50594
6	contig_2_segment0_107	VFG013249(gi:68248611)!(msbA)!lipid!A!export!ATP-binding!protein!MsbA![LOS!(CVF494)]![Haemophilus!influenzae!86-028NP]	30.4	602	385	9	79	1872	15	586	1.1e-60	232.3	587	0.974446	0.327202	VFG013249	msbA	lipid A export ATP-binding protein MsbA	Haemophilus influenzae 86-028NP
7	contig_2_segment0_108	VFG000035(gb|NP_878992)!(bplD)!UDP-N-acetylglucosamine!2-epimerase![LPS!(VF0033)]![Bordetella!pertussis!Tohama!I]	36.2	359	211	6	40	1086	5	355	3.5e-48	189.9	362	0.969613	0.34575	VFG000035	bplD	UDP-N-acetylglucosamine 2-epimerase	Bordetella pertussis Tohama I
8	contig_2_segment0_151	VFG013252(gi:33152665)!(msbA)!ABC!transporter!ATP-binding!protein!MsbA![LOS!(CVF494)]![Haemophilus!ducreyi!35000HP]	28	574	403	5	4	1716	15	581	2.5e-61	234.2	582	0.974227	0.339755	VFG013252	msbA	ABC transporter ATP-binding protein MsbA	Haemophilus ducreyi 35000HP
9	contig_2_segment0_155	VFG016428(gi:118480312)!(ugd)!UDP-glucose!6-dehydrogenase![Polysaccharide!capsule!(CVF567)]![Bacillus!thuringiensis!str.!Al!Hakam]	36.4	439	263	8	1	1299	1	429	8.3e-73	271.9	445	0.964045	0.342571	VFG016428	ugd	UDP-glucose 6-dehydrogenase	Bacillus thuringiensis str. Al Hakam
10	contig_2_segment0_192	VFG024200(gi:406033401)!(devR/dosR)!two-component!system!response!regulator![DevR/S!(CVF334)]![Mycobacterium!indicus!pranii!MTCC!9506]	47.9	213	108	1	31	669	8	217	1.6e-48	190.3	218	0.963303	0.341158	VFG024200	devR/dosR	two-component system response regulator	Mycobacterium indicus pranii MTCC 9506
11	contig_2_segment0_195	VFG042739(gi:15600525)!(crc)!catabolite!repression!control!protein![type!IV!pili!(AI097)]![Pseudomonas!aeruginosa!PAO1]	35.7	266	154	6	19	804	1	253	2.3e-41	166.8	259	0.976834	0.329517	VFG042739	crc	catabolite repression control protein	Pseudomonas aeruginosa PAO1
12	contig_2_segment0_217	VFG018662(gi:157151177)!(eno)!enolase![Streptococcal!enolase!(CVF153)]![Streptococcus!gordonii!str.!Challis!substr.!CH1]	59.8	433	166	1	1	1275	1	433	1.4e-146	516.9	434	0.997696	0.340392	VFG018662	eno	enolase	Streptococcus gordonii str. Challis substr. CH1
13	contig_2_segment0_234	VFG044071(gi:15607346)!(Rv0205)!transmembrane!protein![HasA-type!hemophore-mediated!heme!uptake!system!(IA045)]![Mycobacterium!tuberculosis!H37Rv]	33.2	352	235	0	85	1140	14	365	3.1e-45	180.3	367	0.959128	0.347538	VFG044071	Rv0205	transmembrane protein	Mycobacterium tuberculosis H37Rv
14	contig_2_segment0_314	VFG047250!(Fphi_0366)!UDP-N-acetylglucosamine!pyrophosphorylase/glucosamine-1-phosphate!N-acetyltransferase![LPS!(CVF834)]![Francisella!philomiragia!subsp.!philomiragia!ATCC!25017]	35.7	454	277	6	28	1380	4	445	5.7e-67	252.7	451	0.980044	0.333333	VFG047250	Fphi_0366	UDP-N-acetylglucosamine pyrophosphorylase/glucosamine-1-phosphate N-acetyltransferase	Francisella philomiragia subsp. philomiragia ATCC 25017
15	contig_2_segment0_332	VFG048868!(A79E_1603)!GDP-L-fucose!synthetase![Capsule!(CVF854)]![Klebsiella!pneumoniae!subsp.!pneumoniae!1084]	48.4	316	152	2	73	990	8	322	1.4e-85	313.9	322	0.978261	0.350763	VFG048868	A79E_1603	GDP-L-fucose synthetase	Klebsiella pneumoniae subsp. pneumoniae 1084
16	contig_2_segment0_377	VFG043491(gi:24216818)!(ligA)!NAD!dependent!DNA!ligase![Fibronectin-binding!protein!(AI240)]![Leptospira!interrogans!serovar!Lai!str.!56601]	31.7	726	406	18	97	2238	24	671	3.2e-88	323.9	681	0.951542	0.317927	VFG043491	ligA	NAD dependent DNA ligase	Leptospira interrogans serovar Lai str. 56601
17	contig_2_segment0_381	VFG043408(gi:42780821)!(cheY)!chemotaxis!response!regulator![peritrichous!flagella!(AI153)]![Bacillus!cereus!ATCC!10987]	28.4	116	78	1	19	351	5	120	1.9e-09	60.5	122	0.95082	0.366366	VFG043408	cheY	chemotaxis response regulator	Bacillus cereus ATCC 10987
18	contig_2_segment0_434	VFG012973(gi:82775876)!(entA)!2,3-dihydro-2,3-dihydroxybenzoate!dehydrogenase![Enterobactin!synthesis!(CVF477)]![Shigella!dysenteriae!Sd197]	29.7	259	162	5	10	777	3	244	1.7e-17	87.4	248	0.975806	0.322917	VFG012973	entA	2,3-dihydro-2,3-dihydroxybenzoate dehydrogenase	Shigella dysenteriae Sd197
19	contig_2_segment0_440	VFG041575(gi:269138242)!(esrB)!two-component!response!regulator!EsrB,!LuxR!family![T3SS!(SS025)]![Edwardsiella!tarda!EIB202]	31.2	205	136	1	19	618	8	212	3.5e-18	89.4	214	0.957944	0.356667	VFG041575	esrB	two-component response regulator EsrB, LuxR family	Edwardsiella tarda EIB202
20	contig_2_segment0_471	VFG029181(gi:494691572)!(fadE14)!acyl-CoA!dehydrogenase!FADE13![Mycobactin!(CVF315)]![Mycobacterium!tuberculosis!str.!Haarlem/NITR202]	27.9	369	245	9	106	1167	16	378	9e-23	105.5	382	0.950262	0.359699	VFG029181	fadE14	acyl-CoA dehydrogenase FADE13	Mycobacterium tuberculosis str. Haarlem/NITR202
21	contig_2_segment0_477	VFG002189(gb|NP_816140)!(cpsB)!phosphatidate!cytidylyltransferase![Capsule!(VF0361)]![Enterococcus!faecalis!V583]	27.3	271	166	9	106	873	5	259	8.7e-18	88.6	266	0.958647	0.346354	VFG002189	cpsB	phosphatidate cytidylyltransferase	Enterococcus faecalis V583
22	contig_2_segment0_481	VFG000119(gb|NP_253948)!(algR)!alginate!biosynthesis!regulatory!protein!AlgR![Alginate!(VF0091)]![Pseudomonas!aeruginosa!PAO1]	36.8	242	128	4	1	654	5	245	4.7e-27	119	248	0.971774	0.379205	VFG000119	algR	alginate biosynthesis regulatory protein AlgR	Pseudomonas aeruginosa PAO1
23	contig_2_segment0_488	VFG016499(gi:54020422)!(pdhB)!pyruvate!dehydrogenase!(lipoamide)!e1-beta!chain![PDH-B!(CVF588)]![Mycoplasma!hyopneumoniae!232]	42.7	321	178	2	25	975	14	332	1.1e-69	261.2	334	0.95509	0.351209	VFG016499	pdhB	pyruvate dehydrogenase (lipoamide) e1-beta chain	Mycoplasma hyopneumoniae 232
24	contig_2_segment0_493	VFG029172(gi:397679176)!(fadE14)!acyl-CoA!dehydrogenase!YngJ![Mycobactin!(CVF315)]![Mycobacterium!abscessus!subsp.!bolletii!str.!GO!06]	34.3	379	239	4	19	1149	4	374	1.8e-52	204.1	379	0.978892	0.335102	VFG029172	fadE14	acyl-CoA dehydrogenase YngJ	Mycobacterium abscessus subsp. bolletii str. GO 06
25	contig_2_segment0_496	VFG044282(gi:197284140)!(pbtl)!citrate!lyase!beta!chain![Proteobactin!(IA034)]![Proteus!mirabilis!HI4320]	28.6	276	170	8	22	798	6	271	1.4e-14	77.8	278	0.956835	0.357786	VFG044282	pbtl	citrate lyase beta chain	Proteus mirabilis HI4320
26	contig_2_segment0_557	VFG045298(gi:52840987)!(hisH)!imidazole!glycerol!phosphate!synthase!subunit!HisH![LPS!(VF0171)]![Legionella!pneumophila!subsp.!pneumophila!str.!Philadelphia!1]	32.7	220	121	7	109	720	3	211	1.4e-24	110.9	213	0.981221	0.348039	VFG045298	hisH	imidazole glycerol phosphate synthase subunit HisH	Legionella pneumophila subsp. pneumophila str. Philadelphia 1
27	contig_2_segment0_613	VFG037126(gi:385328078)!(recN)!putative!DNA!repair!protein![Recombinational!repair!protein!(CVF763)]![Neisseria!meningitidis!alpha710]	34	577	344	10	1	1707	1	548	5.1e-59	226.5	557	0.983842	0.326303	VFG037126	recN	putative DNA repair protein	Neisseria meningitidis alpha710
28	contig_2_segment0_731	VFG013252(gi:33152665)!(msbA)!ABC!transporter!ATP-binding!protein!MsbA![LOS!(CVF494)]![Haemophilus!ducreyi!35000HP]	31.9	576	384	4	115	1836	13	582	7.2e-67	252.7	582	0.979381	0.337979	VFG013252	msbA	ABC transporter ATP-binding protein MsbA	Haemophilus ducreyi 35000HP
29	contig_2_segment0_767	VFG026433(gi:383308019)!(glnA1)!glutamine!synthetase![Glutamine!synthesis!(CVF311)]![Mycobacterium!tuberculosis!RGTB327]	63.8	450	155	4	1	1335	1	447	1.3e-163	573.5	447	1	0.334831	VFG026433	glnA1	glutamine synthetase	Mycobacterium tuberculosis RGTB327
30	contig_2_segment0_795	VFG009407(gi:145223515)!(glnA1)!glutamine!synthetase,!type!I![Glutamine!synthesis!(CVF311)]![Mycobacterium!gilvum!PYR-GCK]	66.7	474	155	2	10	1422	5	478	5.1e-190	661.4	478	0.991632	0.338287	VFG009407	glnA1	glutamine synthetase, type I	Mycobacterium gilvum PYR-GCK
31	contig_2_segment0_874	VFG022851(gi:333992798)!(sodA)!superoxide!dismutase![Iron-cofactored!!SOD!(CVF324)]![Mycobacterium!sp.!JDM601]	68.8	205	64	0	1	615	1	205	4.7e-79	291.6	206	0.995146	0.334959	VFG022851	sodA	superoxide dismutase	Mycobacterium sp. JDM601
32	contig_2_segment0_875	VFG005341(gi:15674453)!(plr/gapA)!glyceraldehyde-3-phosphate!dehydrogenase![Streptococcal!plasmin!receptor/GAPDH!(CVF123)]![Streptococcus!pyogenes!M1!GAS]	56.9	339	132	7	1	996	1	332	6.1e-97	351.7	336	0.988095	0.337349	VFG005341	plr/gapA	glyceraldehyde-3-phosphate dehydrogenase	Streptococcus pyogenes M1 GAS
33	contig_2_segment0_888	VFG008678(gi:523914455)!(ddrA)!drrA![PDIM!(phthiocerol!dimycocerosate)!and!PGL!(phenolic!glycolipid)!biosynthesis!and!transport!(CVF288)]![Mycobacterium!yongonense!05-1390]	33.9	313	193	5	52	960	4	312	5.9e-34	142.5	312	0.990385	0.343234	VFG008678	ddrA	drrA	Mycobacterium yongonense 05-1390
34	contig_2_segment0_906	VFG011211(gi:33599134)!(wbmC)!putative!glutamine!amidotransferase![LPS!(CVF380)]![Bordetella!bronchiseptica!RB50]	32.1	652	376	18	1	1845	1	622	8.7e-82	302.8	628	0.990446	0.340379	VFG011211	wbmC	putative glutamine amidotransferase	Bordetella bronchiseptica RB50
35	contig_2_segment0_908	VFG039536(gb|NP_820549)!(CBU_1566)!Coxiella!Dot/Icm!type!IVB!secretion!system!translocated!effector!![T4SS!effectors!(CVF803)]![Coxiella!burnetii!RSA!493]	45.9	246	128	4	1	732	1	243	1.1e-53	207.6	244	0.995902	0.333333	VFG039536	CBU_1566	Coxiella Dot/Icm type IVB secretion system translocated effector	Coxiella burnetii RSA 493
36	contig_2_segment0_915	VFG022965(gi:169629960)!(relA)!GTP!pyrophosphokinase![(p)ppGpp!synthesis!and!hydrolysis!(CVF335)]![Mycobacterium!abscessus!ATCC!19977]	57.6	771	312	5	97	2382	19	783	1.8e-259	892.9	788	0.970812	0.344707	VFG022965	relA	GTP pyrophosphokinase	Mycobacterium abscessus ATCC 19977
37	contig_2_segment0_938	VFG047692!(FN3523_0020)!aspartate!carbamoyltransferase![Pyrimidine!biosynthesis!(CVF845)]![Francisella!cf.!tularensis!subsp.!novicida!3523]	28.1	327	200	10	10	951	1	305	6.7e-19	92.4	307	0.993485	0.325902	VFG047692	FN3523_0020	aspartate carbamoyltransferase	Francisella cf. tularensis subsp. novicida 3523
38	contig_2_segment0_939	VFG049120(gb|YP_002918207.1)!(allB)!allantoinase![Allantion!utilization!(VF0572)]![Klebsiella!pneumoniae!subsp.!pneumoniae!NTUH-K2044]	28.4	454	303	10	1	1323	1	445	1.9e-37	154.5	453	0.98234	0.342404	VFG049120	allB	allantoinase	Klebsiella pneumoniae subsp. pneumoniae NTUH-K2044
39	contig_2_segment0_941	VFG047736!(F7308_0022)!carbamoyl-phosphate!synthase!small!chain![Pyrimidine!biosynthesis!(CVF845)]![Francisella!sp.!TX077308]	44.5	391	194	7	37	1176	10	388	6.4e-85	312	388	0.976804	0.340351	VFG047736	F7308_0022	carbamoyl-phosphate synthase small chain	Francisella sp. TX077308
40	contig_2_segment0_942	VFG047705!(carB)!carbamoyl!phosphate!synthase!large!subunit![Pyrimidine!biosynthesis!(CVF845)]![Francisella!tularensis!subsp.!holarctica!OSU18]	51.4	1110	500	9	1	3267	1	1091	0	1082	1095	0.996347	0.33517	VFG047705	carB	carbamoyl phosphate synthase large subunit	Francisella tularensis subsp. holarctica OSU18
41	contig_2_segment0_950	VFG046773!(F7308_1118)!glycosyl!transferase![Capsule!(CVF833)]![Francisella!sp.!TX077308]	25	364	244	8	1	1035	1	354	4.5e-21	99.8	363	0.975207	0.350725	VFG046773	F7308_1118	glycosyl transferase	Francisella sp. TX077308
42	contig_2_segment0_978	VFG031084(gi:433644988)!(zmp1)!endothelin-converting!enzyme![Zn++!metallophrotease!(CVF655)]![Mycobacterium!smegmatis!JS623]	53.7	650	298	2	10	1950	24	673	5.2e-201	698.4	674	0.964392	0.347244	VFG031084	zmp1	endothelin-converting enzyme	Mycobacterium smegmatis JS623
43	contig_2_segment0_1012	VFG015549(gi:152983731)!(phzS)!probable!FAD-dependent!monooxygenase![Phenazines!biosynthesis!(CVF536)]![Pseudomonas!aeruginosa!PA7]	43.5	400	207	6	7	1182	7	395	3.2e-79	293.1	402	0.967662	0.341837	VFG015549	phzS	probable FAD-dependent monooxygenase	Pseudomonas aeruginosa PA7
44	contig_2_segment0_1045	VFG031101(gi:169629269)!(pafA)!hypothetical!protein![Proteasome-associated!proteins!(CVF656)]![Mycobacterium!abscessus!ATCC!19977]	63.6	453	164	1	1	1359	1	452	9.6e-170	594	452	1	0.332597	VFG031101	pafA	hypothetical protein	Mycobacterium abscessus ATCC 19977
45	contig_2_segment0_1050	VFG031159(gi:333990426)!(mpa)!ATPase![Proteasome-associated!proteins!(CVF656)]![Mycobacterium!sp.!JDM601]	57.9	608	210	8	19	1755	20	610	3.3e-191	665.6	610	0.968852	0.35118	VFG031159	mpa	ATPase	Mycobacterium sp. JDM601
46	contig_2_segment0_1102	VFG026700(gi:494692156)!(mbtI)!anthranilate!synthase!component!I![Mycobactin!(CVF315)]![Mycobacterium!tuberculosis!str.!Haarlem/NITR202]	52.7	518	225	6	16	1548	6	510	3.6e-136	482.6	516	0.978682	0.336595	VFG026700	mbtI	anthranilate synthase component I	Mycobacterium tuberculosis str. Haarlem/NITR202
47	contig_2_segment0_1114	VFG046612!(FN3523_1292)!Ribulose-phosphate!3-epimerase![Capsule!(CVF833)]![Francisella!cf.!tularensis!subsp.!novicida!3523]	38.2	212	128	2	13	639	6	217	5.3e-36	148.7	222	0.954955	0.354067	VFG046612	FN3523_1292	Ribulose-phosphate 3-epimerase	Francisella cf. tularensis subsp. novicida 3523
48	contig_2_segment0_1165	VFG038840(gi:507521851)!(flmH)!3-oxoacyl-ACP!reductase![Polar!flagella!(VF0473)]![Aeromonas!hydrophila!ML09-119]	37.2	234	147	0	616	1317	6	239	3.6e-36	150.2	244	0.959016	0.347578	VFG038840	flmH	3-oxoacyl-ACP reductase	Aeromonas hydrophila ML09-119
49	contig_2_segment0_1182	VFG038840(gi:507521851)!(flmH)!3-oxoacyl-ACP!reductase![Polar!flagella!(VF0473)]![Aeromonas!hydrophila!ML09-119]	45.5	242	125	2	13	717	2	243	5.5e-55	211.8	244	0.991803	0.346099	VFG038840	flmH	3-oxoacyl-ACP reductase	Aeromonas hydrophila ML09-119
50	contig_2_segment0_1206	VFG044427(gi:114416732)!(vabA)!2,3-dihydroxybenzoate-2,3-dehydrogenase![Vanchrobactin!(IA025)]![Listonella!anguillarum!RV22]	27.7	253	171	5	46	780	6	254	3.5e-13	73.2	258	0.965116	0.35102	VFG044427	vabA	2,3-dihydroxybenzoate-2,3-dehydrogenase	Listonella anguillarum RV22
51	contig_2_segment0_1226	VFG006495(gi:109948025)!(ureG)!urease!accessory!protein!UreG![Urease!(CVF221)]![Helicobacter!acinonychis!str.!Sheeba]	63.6	198	72	0	13	606	2	199	5.2e-75	278.1	199	0.994975	0.335017	VFG006495	ureG	urease accessory protein UreG	Helicobacter acinonychis str. Sheeba
52	contig_2_segment0_1229	VFG006476(gi:32265907)!(ureB)!urease![Urease!(CVF221)]![Helicobacter!hepaticus!ATCC!51449]	62.5	579	204	3	421	2151	2	569	8.5e-213	737.6	569	0.998243	0.328712	VFG006476	ureB	urease	Helicobacter hepaticus ATCC 51449
53	contig_2_segment0_1254	VFG031731(gi:126433265)!(regX3)!two!component!transcriptional!regulator![RegX3!(CVF667)]![Mycobacterium!sp.!JLS]	36.2	221	136	2	1	648	5	225	1.1e-38	157.5	228	0.969298	0.351852	VFG031731	regX3	two component transcriptional regulator	Mycobacterium sp. JLS
54	contig_2_segment0_1262	VFG023911(gi:315443822)!(kasB)!3-oxoacyl-ACP!synthase![FAS-II!(CVF300)]![Mycobacterium!gilvum!Spyr1]	43.3	416	218	10	16	1242	12	416	3.6e-70	263.1	417	0.971223	0.339853	VFG023911	kasB	3-oxoacyl-ACP synthase	Mycobacterium gilvum Spyr1
55	contig_2_segment0_1265	VFG013568(gi:68248709)!(hitB)!iron(III)-transport!system!permease!protein!hFbpB![Haemophilus!iron!transport!locus!(CVF501)]![Haemophilus!influenzae!86-028NP]	35.5	501	315	4	79	1569	4	500	1.6e-75	281.2	506	0.982213	0.33937	VFG013568	hitB	iron(III)-transport system permease protein hFbpB	Haemophilus influenzae 86-028NP
56	contig_2_segment0_1266	VFG006259(gi:59800668)!(fbpC)!ABC!transporter,!ATP-binding!protein,!iron!related![ABC!transporter!(CVF197)]![Neisseria!gonorrhoeae!FA!1090]	40.4	361	192	6	76	1140	5	348	1.9e-62	237.3	352	0.977273	0.330516	VFG006259	fbpC	ABC transporter, ATP-binding protein, iron related	Neisseria gonorrhoeae FA 1090
57	contig_2_segment0_1268	VFG022925(gi:333989463)!(prrA)!two-component!response!transcriptional!regulatory!protein!PrrA![PrrA/B!(CVF332)]![Mycobacterium!sp.!JDM601]	38.6	228	126	6	4	651	6	231	5.1e-31	132.1	236	0.957627	0.364198	VFG022925	prrA	two-component response transcriptional regulatory protein PrrA	Mycobacterium sp. JDM601
58	contig_2_segment0_1307	VFG047143!(wbtF)!NAD!dependent!epimerase![LPS!(CVF834)]![Francisella!novicida!U112]	25.2	317	196	12	67	915	15	324	6.5e-11	65.9	324	0.95679	0.381625	VFG047143	wbtF	NAD dependent epimerase	Francisella novicida U112
59	contig_2_segment0_1322	VFG031508(gi:523913029)!(ndk)!nucleoside!diphosphate!kinase![Nucleoside!diphosphate!kinase!(CVF660)]![Mycobacterium!yongonense!05-1390]	68.1	135	38	2	10	411	3	133	1.4e-44	176.4	136	0.963235	0.338308	VFG031508	ndk	nucleoside diphosphate kinase	Mycobacterium yongonense 05-1390
60	contig_2_segment0_1339	VFG005552(gi:125718786)!(tig/ropA)!Trigger!factor,!putative![Trigger!factor!(CVF149)]![Streptococcus!sanguinis!SK36]	28.4	430	277	10	16	1239	6	426	4e-35	146.7	427	0.985948	0.348856	VFG005552	tig/ropA	Trigger factor, putative	Streptococcus sanguinis SK36
61	contig_2_segment0_1407	VFG048851!(gnd)!6-phosphogluconate!dehydrogenase![Capsule!(CVF854)]![Klebsiella!pneumoniae!subsp.!pneumoniae!MGH!78578]	56.7	464	197	4	10	1395	5	466	3.4e-141	499.2	468	0.987179	0.337662	VFG048851	gnd	6-phosphogluconate dehydrogenase	Klebsiella pneumoniae subsp. pneumoniae MGH 78578
62	contig_2_segment0_1453	VFG009135(gi:383308045)!(kasB)!3-oxoacyl-(acyl!carrier!protein)!synthase!II![FAS-II!(CVF300)]![Mycobacterium!tuberculosis!RGTB327]	45.2	409	217	3	13	1236	14	416	8.9e-98	354.8	416	0.96875	0.339869	VFG009135	kasB	3-oxoacyl-(acyl carrier protein) synthase II	Mycobacterium tuberculosis RGTB327
63	contig_2_segment0_1504	VFG007633(gi:15640934)!(wecC)!UDP-N-acetyl-D-mannosaminuronic!acid!dehydrogenase![Capsular!polysaccharide!(CVF282)]![Vibrio!cholerae!O1!biovar!El!Tor!str.!N16961]	55.6	408	177	4	58	1275	5	410	1.8e-117	420.2	413	0.983051	0.33908	VFG007633	wecC	UDP-N-acetyl-D-mannosaminuronic acid dehydrogenase	Vibrio cholerae O1 biovar El Tor str. N16961
64	contig_2_segment0_1522	VFG009376(gi:118470522)!(leuD)!3-isopropylmalate!dehydratase,!small!subunit![Leucine!synthesis!(CVF309)]![Mycobacterium!smegmatis!str.!MC2!155]	75.1	197	49	0	1	591	1	197	5.3e-88	321.2	197	1	0.333333	VFG009376	leuD	3-isopropylmalate dehydratase, small subunit	Mycobacterium smegmatis str. MC2 155
65	contig_2_segment0_1530	VFG009135(gi:383308045)!(kasB)!3-oxoacyl-(acyl!carrier!protein)!synthase!II![FAS-II!(CVF300)]![Mycobacterium!tuberculosis!RGTB327]	46.2	405	214	3	13	1221	13	415	8.8e-90	328.2	416	0.96875	0.344086	VFG009135	kasB	3-oxoacyl-(acyl carrier protein) synthase II	Mycobacterium tuberculosis RGTB327
66	contig_2_segment0_1535	VFG024200(gi:406033401)!(devR/dosR)!two-component!system!response!regulator![DevR/S!(CVF334)]![Mycobacterium!indicus!pranii!MTCC!9506]	42.1	235	117	5	1	702	1	217	1.9e-39	160.2	218	0.995413	0.310541	VFG024200	devR/dosR	two-component system response regulator	Mycobacterium indicus pranii MTCC 9506
67	contig_2_segment0_1554	VFG037008(gi:313667899)!(mtrD)!drug!efflux!protein![MtrCDE!(CVF759)]![Neisseria!lactamica!020-06]	27	1059	675	27	49	3039	14	1036	4.9e-60	230.7	1067	0.958763	0.356737	VFG037008	mtrD	drug efflux protein	Neisseria lactamica 020-06
68	contig_2_segment0_1579	VFG013269(gi:33152420)!(orfM)!putative!deoxyribonucleotide!triphosphate!pyrophosphatase![LOS!(CVF494)]![Haemophilus!ducreyi!35000HP]	41.3	196	107	2	37	624	5	192	1e-31	134.4	196	0.959184	0.333333	VFG013269	orfM	putative deoxyribonucleotide triphosphate pyrophosphatase	Haemophilus ducreyi 35000HP
69	contig_2_segment0_1604	VFG041785(gi:46562141)!(DVUA0119)!type!III!secretion!system!ATPase![T3SS!(SS039)]![Desulfovibrio!vulgaris!str.!Hildenborough]	29.2	435	280	13	88	1359	20	437	1.1e-34	145.6	438	0.954338	0.34434	VFG041785	DVUA0119	type III secretion system ATPase	Desulfovibrio vulgaris str. Hildenborough
70	contig_2_segment0_1613	VFG014133(gi:152989709)!(PSPA7_1984)!UDP-glucose!4-epimerase!(Galactowaldenase)!(UDP-galactose4-epimerase)![LPS!O-antigen!(P.!aeruginosa)!(CVF520)]![Pseudomonas!aeruginosa!PA7]	40.6	315	181	2	4	945	3	312	3.2e-55	213	318	0.974843	0.33758	VFG014133	PSPA7_1984	UDP-glucose 4-epimerase (Galactowaldenase) (UDP-galactose4-epimerase)	Pseudomonas aeruginosa PA7
71	contig_2_segment0_1635	VFG049122(gb|YP_002918211.1)!(allC)!allantoate!amidohydrolase![Allantion!utilization!(VF0572)]![Klebsiella!pneumoniae!subsp.!pneumoniae!NTUH-K2044]	29.6	405	259	9	37	1212	16	407	2.7e-38	157.1	411	0.953771	0.34949	VFG049122	allC	allantoate amidohydrolase	Klebsiella pneumoniae subsp. pneumoniae NTUH-K2044
72	contig_2_segment0_1662	VFG026490(gi:433647323)!(ideR)!Mn-dependent!transcriptional!regulator![Iron-dependent!regulator!(CVF314)]![Mycobacterium!smegmatis!JS623]	32.7	226	133	6	663	19	9	226	1.4e-17	87.8	229	0.951965	0.355039	VFG026490	ideR	Mn-dependent transcriptional regulator	Mycobacterium smegmatis JS623
73	contig_2_segment0_1690	VFG000035(gb|NP_878992)!(bplD)!UDP-N-acetylglucosamine!2-epimerase![LPS!(VF0033)]![Bordetella!pertussis!Tohama!I]	50.3	358	165	8	4	1044	4	359	1.4e-88	323.9	362	0.983425	0.347743	VFG000035	bplD	UDP-N-acetylglucosamine 2-epimerase	Bordetella pertussis Tohama I
74	contig_2_segment0_1693	VFG014103(gi:15598351)!(wbpE)!probable!aminotransferase!WbpE![LPS!O-antigen!(P.!aeruginosa)!(CVF520)]![Pseudomonas!aeruginosa!PAO1]	35.7	347	216	6	37	1065	14	357	2.5e-51	200.3	359	0.958217	0.348882	VFG014103	wbpE	probable aminotransferase WbpE	Pseudomonas aeruginosa PAO1
75	contig_2_segment0_1694	VFG014102(gi:15598352)!(wbpD)!probable!acetyltransferase!WbpD![LPS!O-antigen!(P.!aeruginosa)!(CVF520)]![Pseudomonas!aeruginosa!PAO1]	50	198	89	4	1	588	1	190	3.2e-16	82.8	191	0.994764	0.32483	VFG014102	wbpD	probable acetyltransferase WbpD	Pseudomonas aeruginosa PAO1
76	contig_2_segment0_1697	VFG005934(gi:125718319)!(rgpC)!ABC-type!lipopolysaccharide!transport!system,!permease!component,!putative![Capsule!(CVF186)]![Streptococcus!sanguinis!SK36]	27.1	266	190	2	64	861	7	268	5.9e-24	109	268	0.977612	0.33584	VFG005934	rgpC	ABC-type lipopolysaccharide transport system, permease component, putative	Streptococcus sanguinis SK36
77	contig_2_segment0_1699	VFG026318(gi:206561579)!(BCAL3235)!putative!UDP-galactopyranose!mutase![Capsule!I!(CVF645)]![Burkholderia!cenocepacia!J2315]	44.1	390	205	6	13	1182	4	380	1.1e-92	337.8	383	0.984334	0.32735	VFG026318	BCAL3235	putative UDP-galactopyranose mutase	Burkholderia cenocepacia J2315
78	contig_2_segment0_1720	VFG031729(gi:145220688)!(regX3)!two!component!transcriptional!regulator![RegX3!(CVF667)]![Mycobacterium!gilvum!PYR-GCK]	47.7	222	111	1	13	663	4	225	5.6e-54	208.4	228	0.973684	0.35023	VFG031729	regX3	two component transcriptional regulator	Mycobacterium gilvum PYR-GCK
79	contig_2_segment0_1755	VFG013618(gi:113461372)!(hemL)!glutamate-1-semialdehyde!aminotransferase![Heme!biosynthesis!(CVF506)]![Haemophilus!somnus!129PT]	49.5	430	205	4	1	1278	1	422	1.1e-106	384.4	432	0.976852	0.338028	VFG013618	hemL	glutamate-1-semialdehyde aminotransferase	Haemophilus somnus 129PT
80	contig_2_segment0_1758	VFG038840(gi:507521851)!(flmH)!3-oxoacyl-ACP!reductase![Polar!flagella!(VF0473)]![Aeromonas!hydrophila!ML09-119]	29.8	245	149	3	28	732	9	240	1.2e-20	97.8	244	0.95082	0.346099	VFG038840	flmH	3-oxoacyl-ACP reductase	Aeromonas hydrophila ML09-119
81	contig_2_segment0_1769	VFG044378(gi:28192388)!(qbsC)!QbsC![thioquinolobactin!(IA009)]![Pseudomonas!fluorescens!ATCC!17400]	54.1	399	163	4	28	1206	3	387	1.1e-113	407.5	387	0.994832	0.328244	VFG044378	qbsC	QbsC	Pseudomonas fluorescens ATCC 17400
82	contig_2_segment0_1808	VFG016387(gi:42784426)!(galE)!UDP-glucose!4-epimerase![Polysaccharide!capsule!(CVF567)]![Bacillus!cereus!ATCC!10987]	56.4	335	146	0	1	1005	1	335	3.4e-111	399.1	338	0.991124	0.336318	VFG016387	galE	UDP-glucose 4-epimerase	Bacillus cereus ATCC 10987
83	contig_2_segment0_1834	VFG044260(gi:151220278)!(sbnG)!2-dehydro-3-deoxyglucarate!aldolase![staphyloferrin!B!(IA027)]![Staphylococcus!aureus!subsp.!aureus!str.!Newman]	31.4	258	171	4	22	789	6	259	6.9e-22	102.1	259	0.980695	0.33724	VFG044260	sbnG	2-dehydro-3-deoxyglucarate aldolase	Staphylococcus aureus subsp. aureus str. Newman
84	contig_2_segment0_1878	VFG016382(gi:30023307)!(BC5275)!UTP--glucose-1-phosphate!uridylyltransferase![Polysaccharide!capsule!(CVF567)]![Bacillus!cereus!ATCC!14579]	50	290	137	4	13	879	2	284	1.4e-73	273.9	293	0.96587	0.337947	VFG016382	BC5275	UTP--glucose-1-phosphate uridylyltransferase	Bacillus cereus ATCC 14579
85	contig_2_segment0_1886	VFG021858(gi:118472346)!(exiT)!ABC!transporter!permease![exochelin!(IA032)]![Mycobacterium!smegmatis!str.!MC2!155]	29	559	373	7	85	1713	25	575	4.3e-50	196.8	575	0.958261	0.352977	VFG021858	exiT	ABC transporter permease	Mycobacterium smegmatis str. MC2 155
86	contig_2_segment0_1887	VFG021859(gi:118472884)!(exiT)!ABC!transporter!permease![exochelin!(IA032)]![Mycobacterium!smegmatis!str.!MC2!155]	38.2	581	343	7	94	1809	12	585	1.4e-86	318.2	589	0.974533	0.34324	VFG021859	exiT	ABC transporter permease	Mycobacterium smegmatis str. MC2 155
87	contig_2_segment0_1908	VFG043550(gi:15607581)!(Rv0440)!chaperonin!GroEL![GroEL(Hsp60)/Cpn60.2!(AI353)]![Mycobacterium!tuberculosis!H37Rv]	65.4	529	178	2	1	1584	1	525	2.3e-186	649.4	540	0.972222	0.340909	VFG043550	Rv0440	chaperonin GroEL	Mycobacterium tuberculosis H37Rv
88	contig_2_segment0_1943	VFG013515(gi:148826007)!(mrsA/glmM)!predicted!phosphomannomutase![Exopolysaccharide!(CVF495)]![Haemophilus!influenzae!PittEE]	45.4	445	234	6	7	1332	5	443	2.8e-97	353.2	445	0.986517	0.335596	VFG013515	mrsA/glmM	predicted phosphomannomutase	Haemophilus influenzae PittEE
89	contig_2_segment0_1956	VFG030565(gi:31793499)!(sugA)!sugar-transport!integral!membrane!protein!ABC!transporter!UspA![Trehalose-recycling!ABC!transporter!(CVF651)]![Mycobacterium!bovis!AF2122/97]	34.9	289	179	5	118	978	6	287	7.7e-36	148.7	290	0.972414	0.336818	VFG030565	sugA	sugar-transport integral membrane protein ABC transporter UspA	Mycobacterium bovis AF2122/97
90	contig_2_segment0_1957	VFG030623(gi:145224435)!(sugB)!binding-protein-dependent!transport!systems!inner!membrane!component![Trehalose-recycling!ABC!transporter!(CVF651)]![Mycobacterium!gilvum!PYR-GCK]	32.4	272	177	2	58	867	9	275	8.3e-34	141.7	275	0.970909	0.339506	VFG030623	sugB	binding-protein-dependent transport systems inner membrane component	Mycobacterium gilvum PYR-GCK
91	contig_2_segment0_1984	VFG046459!(Fphi_1039)!elongation!factor!Tu![EF-Tu!(CVF827)]![Francisella!philomiragia!subsp.!philomiragia!ATCC!25017]	69.9	396	117	1	1	1188	1	394	1.2e-163	573.5	394	1	0.33165	VFG046459	Fphi_1039	elongation factor Tu	Francisella philomiragia subsp. philomiragia ATCC 25017
92	contig_2_segment0_2019	VFG031738(gi:169631126)!(regX3)!Sensory!transduction!protein!RegX3![RegX3!(CVF667)]![Mycobacterium!abscessus!ATCC!19977]	36.2	224	133	6	13	657	4	226	3e-26	116.3	228	0.97807	0.353488	VFG031738	regX3	Sensory transduction protein RegX3	Mycobacterium abscessus ATCC 19977
93	contig_2_segment0_2042	VFG044282(gi:197284140)!(pbtl)!citrate!lyase!beta!chain![Proteobactin!(IA034)]![Proteus!mirabilis!HI4320]	32.4	272	159	8	64	822	6	271	3.6e-29	126.3	278	0.956835	0.366271	VFG044282	pbtl	citrate lyase beta chain	Proteus mirabilis HI4320
94	contig_2_segment0_2057	VFG018395(gi:161503675)!(phoP)!hypothetical!protein![PhoPQ!(CVF010)]![Salmonella!enterica!subsp.!arizonae!serovar!62:z4,z23:--!str.!RSK2980]	40.7	226	127	5	1	669	1	222	1.8e-39	160.2	224	0.991071	0.334828	VFG018395	phoP	hypothetical protein	Salmonella enterica subsp. arizonae serovar 62:z4,z23:-- str. RSK2980
95	contig_2_segment0_2068	VFG015853(gi:152989451)!(plcN)!phospholipase!C,!phosphocholine-specific![Non-hemolytic!phospholipase!C!(CVF541)]![Pseudomonas!aeruginosa!PA7]	37.6	736	356	19	58	2133	5	681	4e-122	436.4	692	0.978324	0.333333	VFG015853	plcN	phospholipase C, phosphocholine-specific	Pseudomonas aeruginosa PA7
96	contig_2_segment0_2072	VFG000077(gb|NP_465991)!(clpP)!ATP-dependent!Clp!protease!proteolytic!subunit![ClpP!(VF0074)]![Listeria!monocytogenes!EGD-e]	48.4	190	98	0	16	585	4	193	3.4e-47	185.7	198	0.959596	0.347368	VFG000077	clpP	ATP-dependent Clp protease proteolytic subunit	Listeria monocytogenes EGD-e
97	contig_2_segment0_2091	VFG030400(gi:333989012)!(fadD13)!fatty-acid--CoA!ligase![MymA!operon!(CVF649)]![Mycobacterium!sp.!JDM601]	34.9	490	282	11	193	1656	1	455	2.7e-73	273.9	464	0.980603	0.31694	VFG030400	fadD13	fatty-acid--CoA ligase	Mycobacterium sp. JDM601
98	contig_2_segment0_2113	VFG026864(gi:507421333)!(katG)!catalase/peroxidase!HPI![Catalase-peroxidase!(CVF321)]![Mycobacterium!abscessus!subsp.!bolletii!50594]	65	722	244	5	25	2169	19	738	9.3e-284	973.4	738	0.97561	0.344056	VFG026864	katG	catalase/peroxidase HPI	Mycobacterium abscessus subsp. bolletii 50594
99	contig_2_segment0_2158	VFG031747(gi:406032839)!(regX3)!Sensory!transduction!protein!regX3![RegX3!(CVF667)]![Mycobacterium!indicus!pranii!MTCC!9506]	44.3	228	116	3	1	663	1	224	1.1e-46	184.1	227	0.986784	0.342383	VFG031747	regX3	Sensory transduction protein regX3	Mycobacterium indicus pranii MTCC 9506
100	contig_2_segment0_2165	VFG038840(gi:507521851)!(flmH)!3-oxoacyl-ACP!reductase![Polar!flagella!(VF0473)]![Aeromonas!hydrophila!ML09-119]	38.8	242	139	5	10	720	3	240	9.9e-34	141.4	244	0.97541	0.343179	VFG038840	flmH	3-oxoacyl-ACP reductase	Aeromonas hydrophila ML09-119
101	contig_2_segment0_2183	VFG030565(gi:31793499)!(sugA)!sugar-transport!integral!membrane!protein!ABC!transporter!UspA![Trehalose-recycling!ABC!transporter!(CVF651)]![Mycobacterium!bovis!AF2122/97]	33.1	284	184	2	19	870	11	288	3.6e-37	152.9	290	0.958621	0.340376	VFG030565	sugA	sugar-transport integral membrane protein ABC transporter UspA	Mycobacterium bovis AF2122/97
102	contig_2_segment0_2273	VFG013249(gi:68248611)!(msbA)!lipid!A!export!ATP-binding!protein!MsbA![LOS!(CVF494)]![Haemophilus!influenzae!86-028NP]	28.6	583	390	7	31	1761	16	578	2.5e-56	217.6	587	0.959114	0.33911	VFG013249	msbA	lipid A export ATP-binding protein MsbA	Haemophilus influenzae 86-028NP
103	contig_2_segment0_2278	VFG009331(gi:118471351)!(purC)!phosphoribosylaminoimidazole-succinocarboxamide!synthase![Purine!synthesis!(CVF306)]![Mycobacterium!smegmatis!str.!MC2!155]	53.7	296	127	3	31	906	5	294	1.9e-92	336.7	299	0.9699	0.341324	VFG009331	purC	phosphoribosylaminoimidazole-succinocarboxamide synthase	Mycobacterium smegmatis str. MC2 155
104	contig_2_segment0_2286	VFG038839(gb|YP_858598)!(flmH)!short!chain!dehydrogenase/reductase!family!oxidoreductase![Polar!flagella!(CVF786)]![Aeromonas!hydrophila!subsp.!hydrophila!ATCC!7966]	31.3	249	162	4	37	768	3	247	2.7e-15	80.1	249	0.983936	0.340164	VFG038839	flmH	short chain dehydrogenase/reductase family oxidoreductase	Aeromonas hydrophila subsp. hydrophila ATCC 7966
105	contig_2_segment0_2348	VFG016303(gi:16078902)!(capD)!gamma-glutamyltranspeptidase![Polyglutamic!acid!capsule!(CVF566)]![Bacillus!subtilis!subsp.!subtilis!str.!168]	36.9	591	345	9	43	1803	13	579	7.7e-90	328.9	587	0.965928	0.333333	VFG016303	capD	gamma-glutamyltranspeptidase	Bacillus subtilis subsp. subtilis str. 168
106	contig_2_segment0_2391	VFG049191!(A79E_1186)!ClpB!protein![T6SS-II!(CVF861)]![Klebsiella!pneumoniae!subsp.!pneumoniae!1084]	52.4	853	398	4	10	2562	5	851	5.9e-237	818.1	857	0.988331	0.335684	VFG049191	A79E_1186	ClpB protein	Klebsiella pneumoniae subsp. pneumoniae 1084
107	contig_2_segment0_2395	VFG009866(gi:126437246)!(mprA)!two!component!transcriptional!regulator,!winged!helix!family![MprA/B!(CVF333)]![Mycobacterium!sp.!JLS]	39.4	221	128	2	1	645	3	223	3e-39	159.5	230	0.96087	0.356589	VFG009866	mprA	two component transcriptional regulator, winged helix family	Mycobacterium sp. JLS
108	contig_2_segment0_2411	VFG038840(gi:507521851)!(flmH)!3-oxoacyl-ACP!reductase![Polar!flagella!(VF0473)]![Aeromonas!hydrophila!ML09-119]	37	243	144	5	34	759	9	243	3e-35	146.4	244	0.963115	0.336088	VFG038840	flmH	3-oxoacyl-ACP reductase	Aeromonas hydrophila ML09-119
109	contig_2_segment0_2533	VFG030630(gi:120403530)!(sugB)!binding-protein-dependent!transport!system!inner!membrane!protein![Trehalose-recycling!ABC!transporter!(CVF651)]![Mycobacterium!vanbaalenii!PYR-1]	33.1	272	172	4	112	915	9	274	3.8e-29	126.3	275	0.967273	0.34204	VFG030630	sugB	binding-protein-dependent transport system inner membrane protein	Mycobacterium vanbaalenii PYR-1
110	contig_2_segment0_2575	VFG030115(gi:126435471)!(kefB)!sodium/hydrogen!exchanger![Potassium/proton!antiporter!(CVF647)]![Mycobacterium!sp.!JLS]	49.3	371	185	1	13	1125	5	372	1.9e-81	300.4	384	0.958333	0.345013	VFG030115	kefB	sodium/hydrogen exchanger	Mycobacterium sp. JLS
111	contig_2_segment0_2581	VFG005766(gi:25010702)!(cylG)!hypothetical!protein![Beta-hemolysin/cytolysin!(CVF171)]![Streptococcus!agalactiae!NEM316]	29	245	158	6	22	741	3	236	2.3e-17	87	240	0.975	0.333333	VFG005766	cylG	hypothetical protein	Streptococcus agalactiae NEM316
112	contig_2_segment0_2598	VFG013732(gi:25027240)!(fagC)!putative!iron!transporter!ATP-binding!protein![ABC!transporter!(CVF516)]![Corynebacterium!efficiens!YS-314]	60	260	104	0	10	789	7	266	4.8e-84	308.5	272	0.955882	0.348718	VFG013732	fagC	putative iron transporter ATP-binding protein	Corynebacterium efficiens YS-314
113	contig_2_segment0_2634	VFG030302(gi:333990991)!(adhD)!zinc-containing!alcohol!dehydrogenase!NAD-!dependent!AdhD![MymA!operon!(CVF649)]![Mycobacterium!sp.!JDM601]	39.1	348	206	5	52	1080	14	360	1.6e-58	224.2	363	0.955923	0.35277	VFG030302	adhD	zinc-containing alcohol dehydrogenase NAD- dependent AdhD	Mycobacterium sp. JDM601
114	contig_2_segment0_2665	VFG016506(gi:71894295)!(pdhB)!pyruvate!dehydrogenase!E1!component,!beta!subunit![PDH-B!(CVF588)]![Mycoplasma!synoviae!53]	42	324	186	2	7	978	8	329	5.6e-71	265.4	331	0.97281	0.340535	VFG016506	pdhB	pyruvate dehydrogenase E1 component, beta subunit	Mycoplasma synoviae 53
115	contig_2_segment0_2696	VFG015091(gi:146307398)!(gacA)!two!component!transcriptional!regulator,!LuxR!family![GacS/GacA!two-component!system!(CVF529)]![Pseudomonas!mendocina!ymp]	35	220	131	2	46	702	2	210	1e-29	127.9	214	0.976636	0.325723	VFG015091	gacA	two component transcriptional regulator, LuxR family	Pseudomonas mendocina ymp
116	contig_2_segment0_2838	VFG000079(gb|NP_463763)!(clpC)!endopeptidase!Clp!ATP-binding!chain!C![ClpC!(VF0072)]![Listeria!monocytogenes!EGD-e]	61.5	806	299	4	1	2418	2	796	1e-281	966.8	820	0.969512	0.339123	VFG000079	clpC	endopeptidase Clp ATP-binding chain C	Listeria monocytogenes EGD-e
117	contig_2_segment0_2863	VFG043408(gi:42780821)!(cheY)!chemotaxis!response!regulator![peritrichous!flagella!(AI153)]![Bacillus!cereus!ATCC!10987]	30.3	119	83	0	7	363	4	122	1.8e-12	70.5	122	0.97541	0.341737	VFG043408	cheY	chemotaxis response regulator	Bacillus cereus ATCC 10987
118	contig_2_segment0_2884	VFG044201(gi:66045819)!(ascF)!diaminobutyrate--2-oxoglutarate!aminotransferase![achromobactin!(IA003)]![Pseudomonas!syringae!pv.!syringae!B728a]	33.3	448	270	15	73	1365	17	452	8e-47	185.7	458	0.951965	0.354215	VFG044201	ascF	diaminobutyrate--2-oxoglutarate aminotransferase	Pseudomonas syringae pv. syringae B728a
119	contig_2_segment0_2932	VFG015930(gi:70729947)!(hcnC)!hydrogen!cyanide!synthase!HcnC![Hydrogen!cyanide!production!(CVF549)]![Pseudomonas!fluorescens!Pf-5]	28.7	429	246	9	1	1161	1	411	1.9e-33	141	417	0.985612	0.359173	VFG015930	hcnC	hydrogen cyanide synthase HcnC	Pseudomonas fluorescens Pf-5
120	contig_2_segment0_2954	VFG044219(gi:47530636)!(fhuC)!iron!compound!ABC!transporter!ATP-binding!protein![petrobactin!(IA028)]![Bacillus!anthracis!str.!Ames!Ancestor]	53.6	250	116	0	1	750	1	250	1.1e-71	267.3	250	1	0.333333	VFG044219	fhuC	iron compound ABC transporter ATP-binding protein	Bacillus anthracis str. Ames Ancestor
121	contig_2_segment0_3051	VFG005766(gi:25010702)!(cylG)!hypothetical!protein![Beta-hemolysin/cytolysin!(CVF171)]![Streptococcus!agalactiae!NEM316]	31.6	244	157	4	43	768	2	237	8.3e-25	111.7	240	0.983333	0.330579	VFG005766	cylG	hypothetical protein	Streptococcus agalactiae NEM316
122	contig_2_segment0_3067	VFG044255(gi:151220273)!(sbnB)!ornithine!cyclodeaminase![staphyloferrin!B!(IA027)]![Staphylococcus!aureus!subsp.!aureus!str.!Newman]	22.3	327	240	6	25	978	14	335	6.8e-16	82.4	336	0.958333	0.352201	VFG044255	sbnB	ornithine cyclodeaminase	Staphylococcus aureus subsp. aureus str. Newman
123	contig_2_segment0_3070	VFG044339(gi:292489702)!(dfoA)!L-lysine!6-monooxygenase!involved!in!desferrioxamine!biosynthesis![desferrioxamine!(IA033)]![Erwinia!amylovora!CFBP1430]	60.2	427	157	5	34	1296	5	424	5.9e-143	505	430	0.976744	0.340459	VFG044339	dfoA	L-lysine 6-monooxygenase involved in desferrioxamine biosynthesis	Erwinia amylovora CFBP1430
124	contig_2_segment0_3094	VFG030630(gi:120403530)!(sugB)!binding-protein-dependent!transport!system!inner!membrane!protein![Trehalose-recycling!ABC!transporter!(CVF651)]![Mycobacterium!vanbaalenii!PYR-1]	50.4	268	127	3	76	870	10	274	5.4e-65	245.4	275	0.963636	0.345912	VFG030630	sugB	binding-protein-dependent transport system inner membrane protein	Mycobacterium vanbaalenii PYR-1
125	contig_2_segment0_3127	VFG030400(gi:333989012)!(fadD13)!fatty-acid--CoA!ligase![MymA!operon!(CVF649)]![Mycobacterium!sp.!JDM601]	37.2	468	274	8	181	1566	2	455	2.6e-70	263.8	464	0.978448	0.334776	VFG030400	fadD13	fatty-acid--CoA ligase	Mycobacterium sp. JDM601
126	contig_2_segment0_3172	VFG022587(gi:333989098)!(icl)!isocitrate!lyase!Icl![Isocitrate!lyase!(CVF302)]![Mycobacterium!sp.!JDM601]	79.1	431	82	2	22	1314	6	428	1.5e-199	693	428	0.988318	0.331013	VFG022587	icl	isocitrate lyase Icl	Mycobacterium sp. JDM601
127	contig_2_segment0_3215	VFG043004(gi:304364194)!(fimA)!surface-anchored!fimbrial!subunit![Type!2!pili!(AI136)]![Actinomyces!viscosus!C505]	33	542	274	22	1	1398	1	529	4.9e-44	176.4	535	0.988785	0.38269	VFG043004	fimA	surface-anchored fimbrial subunit	Actinomyces viscosus C505
128	contig_2_segment0_3230	VFG030295(gi:118619910)!(adhD)!zinc-type!alcohol!dehydrogenase!AdhD![MymA!operon!(CVF649)]![Mycobacterium!ulcerans!Agy99]	35.1	379	221	5	25	1089	4	381	2.9e-52	203.4	385	0.981818	0.361502	VFG030295	adhD	zinc-type alcohol dehydrogenase AdhD	Mycobacterium ulcerans Agy99
129	contig_2_segment0_3257	VFG009805(gi:145222173)!(phoP)!two!component!transcriptional!regulator,!winged!helix!family![PhoP/R!(CVF331)]![Mycobacterium!gilvum!PYR-GCK]	49.1	230	114	2	46	726	6	235	8e-62	234.6	238	0.966387	0.349486	VFG009805	phoP	two component transcriptional regulator, winged helix family	Mycobacterium gilvum PYR-GCK
130	contig_2_segment0_3283	VFG013188(gi:170717277)!(manB)!Phosphomannomutase![Exopolysaccharide!(CVF495)]![Haemophilus!somnus!2336]	40.7	462	256	8	40	1413	7	454	4.1e-83	306.2	454	0.986784	0.330422	VFG013188	manB	Phosphomannomutase	Haemophilus somnus 2336
131	contig_2_segment0_3299	VFG030155(gi:145223491)!(caeA)!TAP!domain-containing!protein![Carboxylesterase!(CVF648)]![Mycobacterium!gilvum!PYR-GCK]	36.6	478	274	11	232	1599	25	495	4.3e-76	283.1	495	0.951515	0.361842	VFG030155	caeA	TAP domain-containing protein	Mycobacterium gilvum PYR-GCK
132	contig_2_segment0_3307	VFG031677(gi:118471880)!(senX3)!sensor!histidine!kinase!SenX3![SenX3!(CVF666)]![Mycobacterium!smegmatis!str.!MC2!155]	43.2	375	204	5	34	1146	7	376	8.4e-72	268.5	384	0.963542	0.345013	VFG031677	senX3	sensor histidine kinase SenX3	Mycobacterium smegmatis str. MC2 155
133	contig_2_segment0_3308	VFG031747(gi:406032839)!(regX3)!Sensory!transduction!protein!regX3![RegX3!(CVF667)]![Mycobacterium!indicus!pranii!MTCC!9506]	74.8	226	56	1	1	675	1	226	1.9e-94	342.8	227	0.995595	0.336296	VFG031747	regX3	Sensory transduction protein regX3	Mycobacterium indicus pranii MTCC 9506
